1 **AAK1 inhibits WNT signaling by promoting clathrin-mediated endocytosis of LRP6**

2

3 Megan J. Agajanian<sup>‡1,2</sup>, Matthew P. Walker<sup>‡1</sup>, Alison D. Axtman<sup>‡3,4</sup>, Roberta R. Ruela-de-Sousa<sup>‡5</sup>,

4 Alex D. Rabinowitz<sup>1</sup>, David M. Graham<sup>6</sup>, Meagan Ryan<sup>1,2</sup>, D. Stephen Serafin<sup>1</sup>, James M.

5 Bennett<sup>7</sup>, Rafael M. Couñago<sup>5</sup>, David H. Drewry<sup>3,4</sup>, Jonathan M. Elkins<sup>5,7</sup>, Carina Gileadi<sup>7</sup>, Opher

6 Gileadi<sup>5,7</sup>, Paulo H. Godoi<sup>5</sup>, Nirav Kapadia<sup>3,4</sup>, Susanne Müller<sup>8</sup>, André S. Santiago<sup>5</sup>, Fiona J.

7 Sorrell<sup>7</sup>, Carrow I. Wells<sup>3,4</sup>, Oleg Fedorov<sup>7</sup>, Timothy M. Willson<sup>3,4</sup>, William J. Zuercher<sup>1,3,4</sup>,

8 Michael B. Major<sup>\*1,2,6,9</sup>

9

10 <sup>‡</sup>Authors contributed equally to this work

11

12 <sup>1</sup> Lineberger Comprehensive Cancer Center, University of North Carolina at Chapel Hill, Chapel  
13 Hill, North Carolina, USA

14 <sup>2</sup> Department of Pharmacology, University of North Carolina at Chapel Hill, Chapel Hill, North  
15 Carolina, USA

16 <sup>3</sup> Structural Genomics Consortium, UNC Eshelman School of Pharmacy, University of North  
17 Carolina at Chapel Hill, Chapel Hill, NC, USA

18 <sup>4</sup> Division of Chemical Biology and Medicinal Chemistry, UNC Eshelman School of Pharmacy,  
19 University of North Carolina at Chapel Hill, Chapel Hill, NC, USA

20 <sup>5</sup> Structural Genomics Consortium, Universidade Estadual de Campinas — UNICAMP,  
21 Campinas, SP, Brazil

22 <sup>6</sup> Department of Cell Biology and Physiology, University of North Carolina at Chapel Hill,  
23 Chapel Hill, North Carolina, USA

24 <sup>7</sup> Structural Genomics Consortium and Target Discovery Institute, Nuffield Department of  
25 Clinical Medicine, University of Oxford, Old Road Campus Research Building, Oxford, OX3  
26 7DQ, UK.

27 <sup>8</sup> Structural Genomics Consortium, Buchmann Institute for Molecular Life Sciences, Goethe  
28 University Frankfurt, Frankfurt am Main, Germany

29 <sup>9</sup> Department of Computer Science, University of North Carolina at Chapel Hill, Chapel Hill,  
30 North Carolina 27599, USA

31

32 **Running title:** AAK1 inhibits WNT signaling

33 **Key Words:** WNT signaling, endocytosis, gain-of-function screen, AAK1, clathrin, kinase

34

35 \*To whom correspondence should be addressed:

36 Michael B. Major, Department of Cell Biology and Physiology, Lineberger Comprehensive  
37 Cancer Center, University of North Carolina at Chapel Hill, 450 West Drive, Lineberger  
38 Building, CB#7295, Chapel Hill, NC, 27599, USA. Telephone: (919)-259-2695. Fax: (919)-966-  
39 9673. Email: [benmajor@med.unc.edu](mailto:benmajor@med.unc.edu)

40

## 41 **SUMMARY STATEMENT**

42 A gain-of-function screen of the human kinome revealed AAK1 as a negative regulator of WNT  
43 signaling. We show that AAK1 promotes clathrin-mediated endocytosis of LRP6, resulting in  
44 downregulation of WNT signaling. We use a new selective and potent AAK1/BMP2K small  
45 molecule probe to validate our findings.

46

47 **ABSTRACT**

48  $\beta$ -catenin-dependent WNT signal transduction governs normal development and adult tissue  
49 homeostasis. Inappropriate pathway activity mediates a vast array of human diseases, including  
50 bone density disorders, neurodegeneration and cancer. Although several WNT-directed  
51 therapeutics are in clinical trials, new targets, compounds and strategies are needed. We performed  
52 a gain-of-function screen of the human kinome to identify new druggable regulators of  $\beta$ -catenin-  
53 dependent transcription. We found that over-expression of the AP2 Associated Kinase 1 (AAK1)  
54 strongly inhibited WNT signaling. Reciprocally, silencing of AAK1 expression or  
55 pharmacological inhibition of AAK1 kinase activity using a new, selective and potent small  
56 molecule inhibitor activated WNT signaling. This small molecule is a cell active dual  
57 AAK1/BMP2K inhibitor that represents the best available tool to study AAK1-dependent  
58 signaling pathways. We report that AAK1 and the WNT co-receptor LRP6 physically co-complex  
59 and that AAK1 promotes clathrin-mediated endocytosis of LRP6. Collectively, our data support a  
60 WNT-induced negative feedback loop mediated by AAK1-driven, clathrin-mediated endocytosis  
61 of LRP6.

62

63 **INTRODUCTION**

64  $\beta$ -catenin-dependent WNT signal transduction is an evolutionarily conserved pathway that  
65 instructs cell and tissue-specific differentiation and proliferation programs. It is both required for  
66 normal development and maintenance of adult tissue homeostasis<sup>1</sup>. Like many developmental  
67 signaling pathways, aberrant WNT signaling contributes fundamentally to human disease,  
68 including cancer, bone density disorders and neurodegeneration<sup>1</sup>. The regulation of the WNT/ $\beta$ -  
69 catenin signaling axis is often described in three stages: proximal signaling,  $\beta$ -catenin destruction

70 and nuclear effectors of transcription<sup>2</sup>. In the absence of WNT ligand, the LRP5/6 (Low-density  
71 lipoprotein receptor related protein 5/6) and FZD (Frizzled) family of WNT receptors remain  
72 dissociated. Within the cytosolic compartment, a multi-protein  $\beta$ -catenin destruction complex  
73 comprises AXIN1/2, APC (Adenomatous polyposis coli), CK1 $\alpha$  (Casein kinase 1 $\alpha$ ), and GSK3 $\beta$   
74 (Glycogen synthase kinase 3 $\beta$ ). CK1 $\alpha$  and GSK3 $\beta$  sequentially phosphorylate  $\beta$ -catenin, resulting  
75 in its ubiquitylation by  $\beta$ -TRCP and ultimately proteasomal degradation<sup>3-6</sup>. Extracellular WNT  
76 ligand physically couples LRP5/6 and FZD receptors, leading to phosphorylation-dependent  
77 recruitment of the AXIN1/2, APC, GSK3 $\beta$  and DVL (Dishevelled1/2/3) proteins<sup>7</sup>. This complex,  
78 referred to as the LRP6 signalosome, transiently suppresses  $\beta$ -catenin phosphorylation by  
79 GSK3 $\beta$ <sup>7</sup>. Hence, WNT ligand transiently inactivates the destruction complex to promote  
80 cytoplasmic accumulation of  $\beta$ -catenin, resulting in its translocation to the nucleus, where it binds  
81 to members of the TCF/LEF family of transcription factors to modulate tissue-specific  
82 transcriptional programs and cell phenotypes<sup>8</sup>.

83 Through a gain-of-function screen of the kinome, we discovered that the AAK1 (Adaptor  
84 Associated Kinase 1) kinase negatively regulates  $\beta$ -catenin-dependent WNT signaling by  
85 promoting clathrin-mediated endocytosis (CME) of LRP6. CME is a complex and multi-step  
86 process that removes lipids and transmembrane proteins from the plasma membrane. The assembly  
87 polypeptide 2 (adaptor-related protein 2; AP2) protein complex first recognizes and binds sorting  
88 signals on the intracellular domains of transmembrane cargo proteins<sup>9,10</sup>. Activation of the AP2  
89 machine occurs allosterically through binding cargo, clathrin and PIP2 (Phosphatidylinositol 4,5-  
90 bisphosphate)<sup>11</sup>. This activation coincides with a conformational shift in AP2 from “closed” to  
91 “open”. Open/active AP2 is required for continued clathrin polymerization, cargo recruitment, and  
92 ultimately the maturation of a nascent clathrin-coated pit to a stable, successful endocytic event<sup>10-</sup>



93 <sup>14</sup>. In addition to PIP2, cargo and clathrin, activation of the AP2 complex is promoted by  
94 phosphorylation of the AP2M1 subunit by AAK1<sup>10-14</sup>. Importantly, AAK1-dependent  
95 phosphorylation of AP2M1 is promoted by clathrin assembly<sup>13</sup>, which constitutes a positive feed-  
96 forward loop to promote pit maturation. Once mature, cargo-loaded clathrin-coated pits evolve to  
97 endosomal vesicles through dynamin-mediated scission from the plasma membrane<sup>15</sup>.

98 Numerous studies support a role for CME in both positive and negative regulation of WNT  
99 signaling, though in either scenario a specific role for AAK1 has not been reported<sup>16-20</sup>. First,  
100 clathrin, AP2 and PIP2 are required for WNT-induced LRP6 phosphorylation, signalosome  
101 formation and subsequent WNT signaling<sup>7,19</sup>. AP2 and clathrin recruitment to the LRP6  
102 signalosome is induced by WNT ligand, presumably via WNT-induced PIP2 production<sup>19</sup>. Indeed,  
103 WNT ligand induces a gradual accumulation of PIP2 over a 4-hour after treatment with WNT  
104 ligand<sup>21</sup>. Together, these studies suggest that clathrin-associated machinery is required for WNT-  
105 induced signalosome formation. Second, others have reported that CME of LRP6 downregulates  
106 WNT signaling<sup>20</sup>. For example, disabled homolog 2 (DAB2) drives LRP6 toward clathrin-  
107 mediated endocytosis and represses WNT signaling<sup>18</sup>. Additionally, phosphorylation of LRP6 on  
108 cytoplasmic tyrosine residues drives CME of LRP6, resulting in decreased WNT signaling<sup>22</sup>.  
109 Third, De Robertis and colleagues described a mechanism by which the endocytosed signalosome  
110 is incorporated into multivesicular bodies (MVBs). Here, sequestration of GSK3 $\beta$  in MVBs  
111 suppresses  $\beta$ -catenin phosphorylation, thus potentiating signaling<sup>23</sup>. Last, Gammons and  
112 colleagues describe how signalosome incorporation into clathrin-coated pits allows for DVL  
113 polymerization via domain swapping, an event which promotes WNT signaling activation<sup>24</sup>. All  
114 together, these studies establish CME as a major regulatory feature in WNT signaling, although  
115 contextual and temporal considerations remain largely unresolved.

116 Cross-referencing our gain-of-function screen of the kinome with previously published  
117 loss-of-function screens, we identify AAK1 as a negative regulator of WNT-induced  $\beta$ -catenin  
118 transcription. Gain- and loss-of-function studies reveal that AAK1 negatively regulates WNT  
119 signaling by promoting CME of LRP6. We also report and employ a novel potent and selective  
120 cell active dual AAK1/BMP2K inhibitor, which potentiates WNT signaling. Full characterization  
121 of this small molecule supports that it is the best available tool to interrogate AAK1 biology.  
122 Unexpectedly, we discovered that WNT induces phosphorylation of AP2M1 by AAK1 in a  
123 temporally delayed fashion at 8-10 hours post-WNT3A treatment. Therefore, we propose a  
124 modified model whereby WNT-driven CME promotes a negative feedback mechanism to limit  
125 pathway longevity. More broadly, this work contributes to the ongoing discussion of endocytosis  
126 within WNT signaling by solidifying a role for the AAK1 kinase in removing LRP6 from the cell  
127 plasma membrane.

128

## 129 **RESULTS**

### 130 **Identification of AAK1 as a novel repressor of WNT signaling**

131 Thirty years of research on the WNT pathway has revealed its core components and basic  
132 mechanics. That said, recent improvements in genetic screening technologies and protein mass  
133 spectrometry continue to identify novel modifiers of WNT pathway activity. We, along with  
134 others, have reported genome-wide gain- and loss-of-function genetic screens of the WNT  
135 pathway, illuminating new regulators (eg. FOXP1, USP6, BRAF<sup>V600E</sup>) and their mechanisms of  
136 WNT control<sup>25-27</sup>. Here, we focused on the human kinome to determine which kinases when over-  
137 expressed activate or inhibit WNT3A-driven  $\beta$ -catenin transcription. We cloned 387 kinase open  
138 reading frames (ORF) into a lentiviral expression vector before transient over-expression in

139 HEK293T cells carrying the  $\beta$ -catenin-activated Firefly luciferase reporter (BAR) and a  
140 constitutively expressed *Renilla* (*Ren*) luciferase. Eighteen hours after kinase transfection, cells  
141 were treated with WNT3A conditioned media (CM) for an additional 16 hours before lysis and  
142 BAR/*Ren* reporter quantitation (**Supplementary Table 1**). ANKRD6/Diversin and CTNNB1/ $\beta$ -  
143 catenin served as negative and positive controls, respectively. Five kinases (AAK1, ADCK1,  
144 ADCK2, MAST1 and TGFBR3) were validated by low throughput reporter assays in HEK293T-  
145 BAR/*Ren* cells (**Fig. 1a**). Comparative analysis of this kinome gain-of-function screen in  
146 HEK293T cells with two previously published siRNA-based loss-of-function screens in HT1080  
147 sarcoma cells and A375 melanoma cells revealed a single common protein: AP2 Associated  
148 Kinase 1 (AAK1) (**Supplementary Table 1**)<sup>25,27</sup>. Because of the well-established functional  
149 connections between AAK1 and CME, and the emerging data on CME in governing WNT  
150 pathway dynamics, we sought to understand how AAK1 negatively regulates the WNT pathway.

151 To validate and extend the discovery of AAK1 as a WNT inhibitor, we tested: 1) whether  
152 siRNA-mediated silencing of AAK1 activated  $\beta$ -catenin-driven transcription, 2) the cell-type  
153 specificity of the AAK1-WNT phenotype, 3) whether AAK1 regulated the expression of  
154 endogenous  $\beta$ -catenin target genes, and 4) whether AAK1 affected the activity of non-WNT  
155 signaling pathways. First, in agreement with AAK1 over-expression blocking WNT signaling  
156 (**Fig. 1a**), siRNA silencing of AAK1 using two non-overlapping siRNAs increased BAR  
157 expression in HT1080 fibrosarcoma cells and RKO colon cancer cells (**Fig. 1b,c**). To visualize  
158 reporter expression in real time, we silenced AAK1 in HT1080 cells carrying a BAR-mCherry  
159 reporter. Quantitation of mCherry fluorescence confirmed that AAK1 knockdown activated the  
160 BAR reporter (**Fig. 1d**), while AAK1 over-expression suppressed BAR activity (**Fig. 1e**). Third,  
161 to rule out potential reporter-based artifacts, we quantified the expression of two WNT target genes

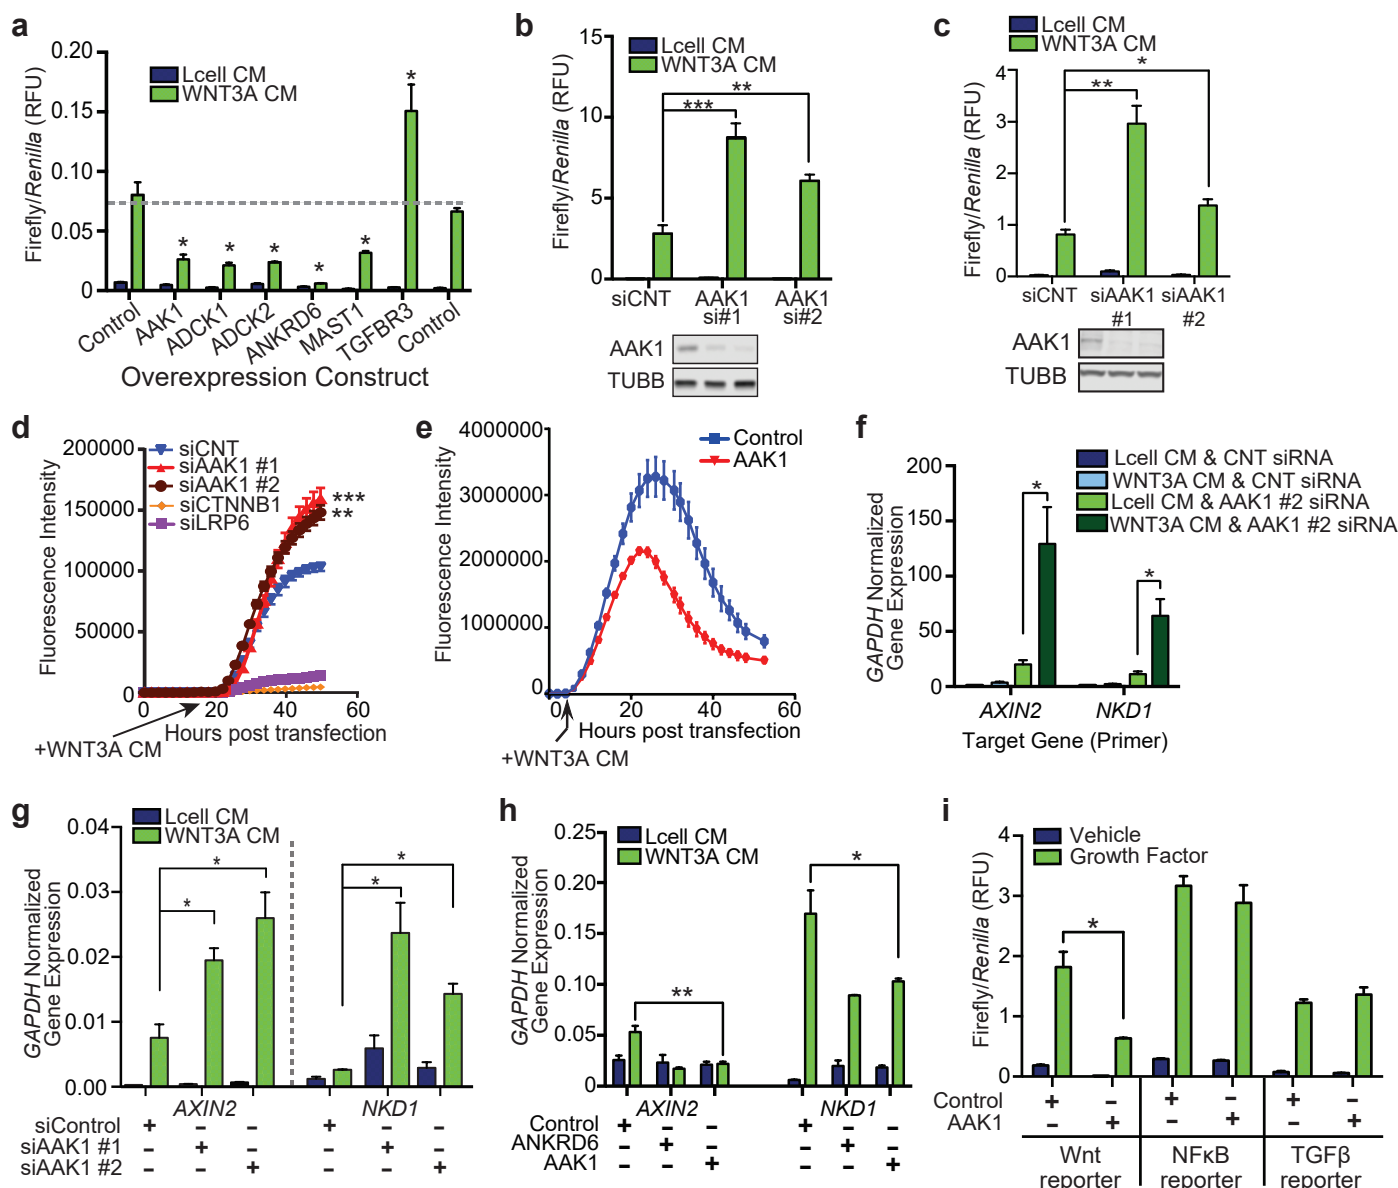

**Figure 1 - Gain-of-function kinome screen reveals AAK1 as a repressor of WNT signaling.** (a) HEK293T-B/R cells were transfected with the indicated construct for 24 hours. Cells were then treated for 16 hours with WNT3A or Lcell CM. Bars represent average Firefly/Renilla relative fluorescence units (RFU) from 3 technical replicates. (b,c) Luciferase assay of HT1080 (b) or RKO (c) stable B/R cells transfected with either control or AAK1 siRNA constructs for 56 hours. Cells were then treated with either Lcell or WNT3A CM for 16 hours. Bars represent average Firefly/Renilla RFU from 3 technical replicates. Western blot analysis illustrates knock down efficiency of two independent AAK1 siRNAs. (d) IncuCyte imaging of HT1080 cells stably expressing a BAR-mCherry fluorescent reporter transiently transfected with indicated siRNA construct. WNT3A CM was added at 18 hours, then cells were imaged for 50 hours post-transfection. Graph represents data points averaged across 4 technical replicates. (e) Live cell imaging of HT1080 cells stably expressing a BAR-mCherry fluorescent reporter transiently transfected with the indicated expression construct, AAK1 or Flag Control. WNT3A CM was added at 8 hours, and cells were monitored for an additional 56 hours. Data represent the average of 4 technical replicates. (f,g) qPCR analysis of *AXIN2* and *NKD1* in HEK293T (f) or HT1080 (g) cells 72 hours after transfection with the indicated siRNA. Cells were treated with WNT3A CM for 6 hours prior to harvest. Bars represent average glyceraldehyde-3-phosphate dehydrogenase (*GAPDH*)-normalized gene expression across 3 technical replicates. (h) qPCR analysis of *AXIN2* and *NKD1* (right) in HEK293T cells transfected with over-expression construct for 24 hours, then treated with WNT3A CM for 6 hours prior to harvest. Bars represent average *GAPDH*-normalized gene expression across 3 technical replicates. (i) Luciferase assay of HEK293T cells transfected with indicated pathway-specific Firefly luciferase reporter constructs and expression constructs prior to a 16 hour treatment with recombinant human (rh) WNT3A (200ng/mL), rhTNFα (200ng/mL) or rhTGFβ1 (200ng/mL). Bars represent average Firefly/Renilla RFU from 3 technical replicates. All panels:\*\*\* p<0.0005, \*\* p<0.005, \* p<0.05. Data are representative of biological triplicates, unless otherwise noted. For complete statistics, see methods and materials.

162 after AAK1 perturbation. AAK1 knockdown increased RNA expression of *AXIN2* and *NKDI* in  
163 both HEK293T and HT1080 cells (**Fig. 1f,g**). Conversely, AAK1 over-expression led to decreased  
164 RNA expression of *AXIN2* and *NKDI* in HEK293T cells (**Fig. 1h**). Fourth, because of its  
165 established roles in CME, AAK1 might broadly regulate other signaling cascades. AAK1 over-  
166 expression did not affect TNF $\alpha$ -driven NF $\kappa$ B reporter activity or TGF $\beta$ -driven SMAD reporter  
167 activity (**Fig. 1i**). Together, these data establish that AAK1 negatively regulates WNT signaling  
168 in cells derived from multiple tissue types. Importantly and consistent with its established role in  
169 CME, AAK1 did not impact  $\beta$ -catenin transcriptional activity in the absence of exogenous  
170 WNT3A stimulation.

171

## 172 **Discovery of a potent and selective inhibitor of AAK1**

173 Indazole compound SB-742864 was previously identified as a semi-selective inhibitor of  
174 AAK1 (*in vitro* IC<sub>50</sub> = 220 nM)<sup>28</sup>. Optimization of SB-742864 via iterative medicinal chemistry  
175 optimization led to compound 25A (**Fig. 2a**), a potent and selective inhibitor of AAK1 and the  
176 closely related kinase, BMP2K. Further optimization to improve the selectivity led to SGC-AAK-  
177 1 (**Fig. 2a**), a chemical probe for AAK1 and BMP2K. A closely related molecule, SGC-AAK1-  
178 1N (referred to as 34A), which is devoid of activity on AAK1 or BMP2K, was identified for use  
179 as a negative control compound. Full details of the chemistry program and analysis of the structure-  
180 activity relationships will be published elsewhere. Compounds 25A and SGC-AAK-1, but not  
181 34A, both selectively inhibited AAK1 and BMP2K over the other members of the subfamily,  
182 Numb-associated kinases GAK and STK16, in a TR-FRET binding displacement assay (**Fig. 2b**,  
183 **Supplementary Fig. 1a**), with  $K_i$  values against AAK1 of 8 nM and 9 nM respectively for 25A  
184 and SGC-AAK1-1 and 2  $\mu$ M for negative control 34A. Both 25A and SGC-AAK1-1 showed good

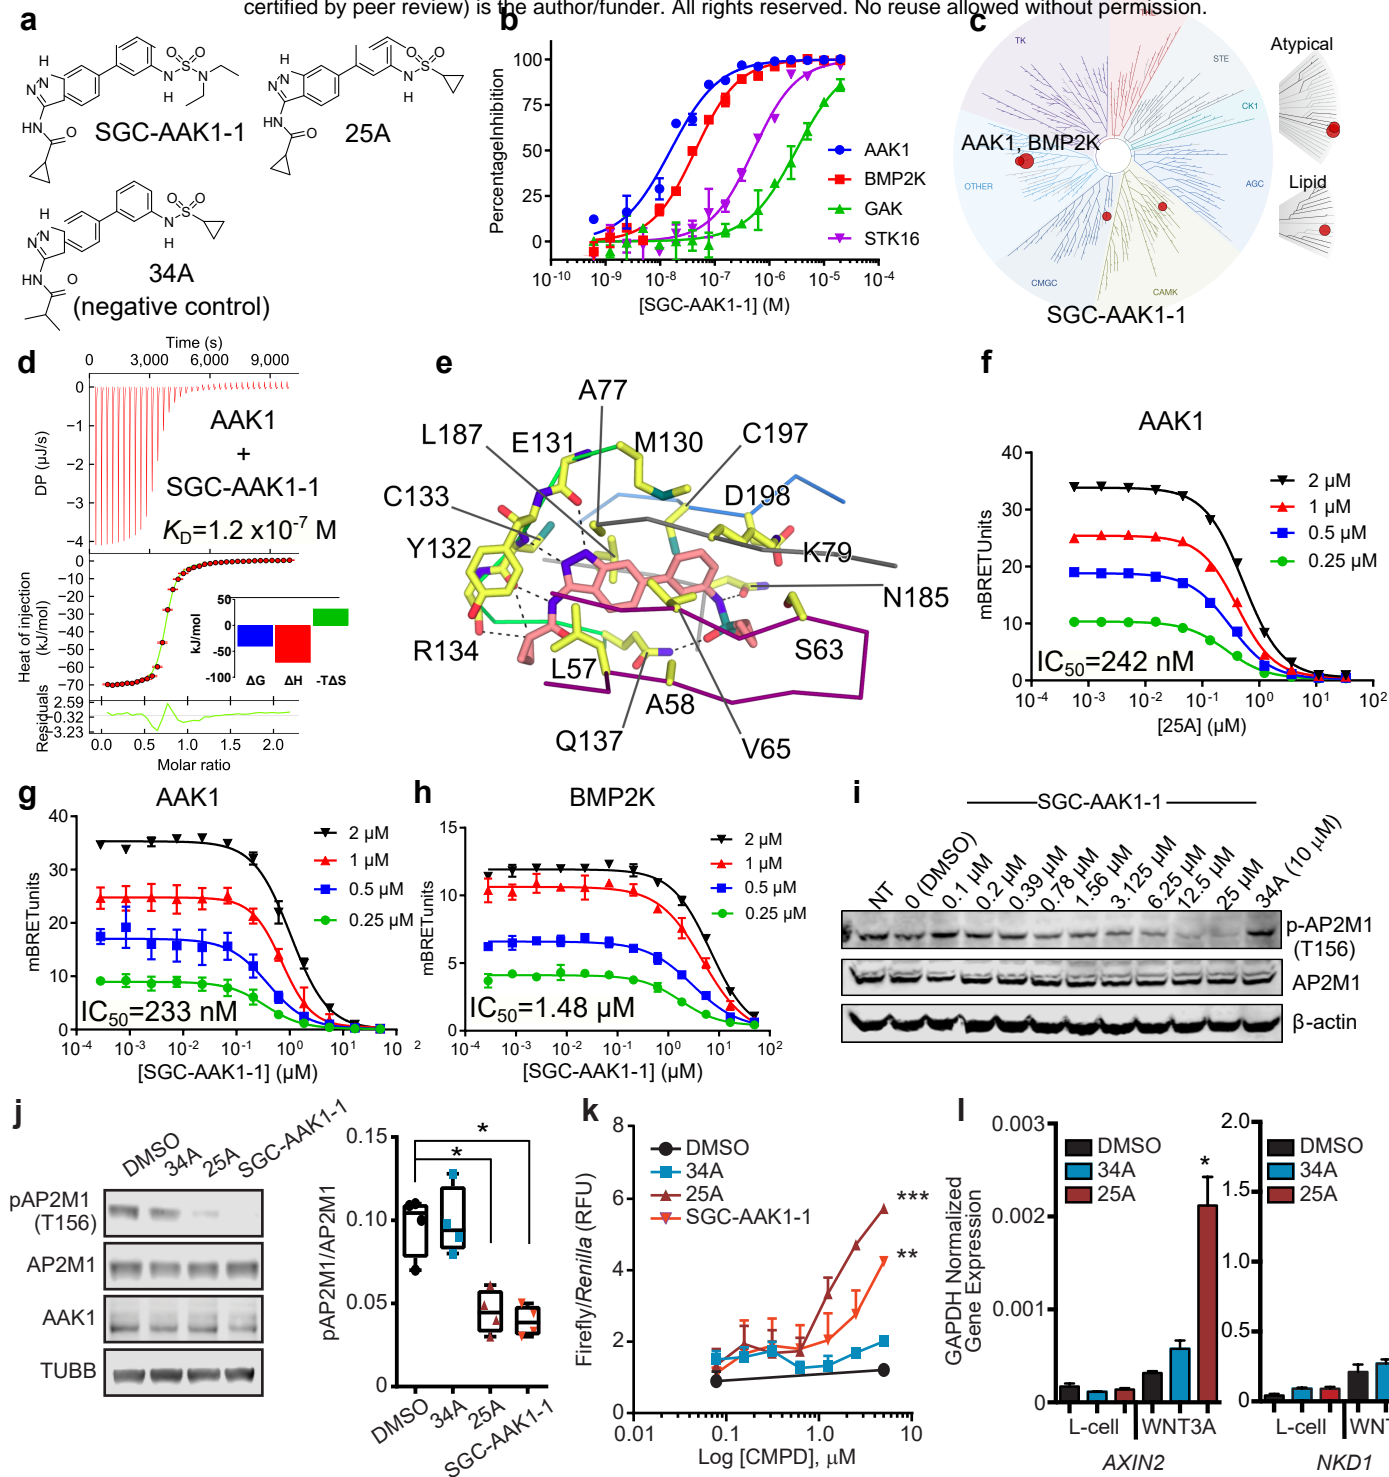

**Figure 2 – SGC-AAK1-1 is a potent and specific inhibitor of AAK1 and BMP2K that is active in cells.** (a) Chemical structures of the AAK1/BMP2K chemical probe SGC-AAK1-1, the related AAK1/BMP2K inhibitor 25A, and the negative control compound 34A that has a similar chemical structure but does not inhibit AAK1 or BMP2K. (b) SGC-AAK1-1 selectively bound AAK1 and BMP2K with a more than 30-fold difference in  $K_i$  in a TR-FRET binding displacement assay over the related kinases GAK and STK16. 16-point dose-response curves were measured in duplicate. (c) SGC-AAK1-1 has good selectivity over the human kinome. SGC-AAK1-1 was used at 1  $\mu$ M concentration. Kinases for which SGC-AAK1-1 has a  $K_D < 100$  nM are marked with a large red circle and 100 nM  $< K_D < 1.0$   $\mu$ M with a smaller red circle. (d) Isothermal titration calorimetry confirmed a dissociation constant ( $K_D$ ) of 120 nM for binding of SGC-AAK1-1 to AAK1. (e) A co-crystal structure of BMP2K (2.41 Å) bound to 25A revealed the binding mode of the inhibitor in the ATP site. (f, g) NanoBRET cellular target engagement assays in HEK293T cells showed that 25A (f) and SGC-AAK1-1 (g) both entered cells and directly bound to AAK1 and displaced a fluorescent tracer molecule from the ATP site. Cells were treated with serially diluted inhibitors in the presence of four different concentrations of a NanoBRET tracer molecule, and  $IC_{50}$  values were calculated from a linear interpolation of the  $IC_{50}$  values at each tracer concentration to obtain the predicted  $IC_{50}$  in the absence of tracer. Measurements were made with three technical replicates. (h) Binding of SGC-AAK1-1 to BMP2K in cells was weaker than to AAK1 with  $IC_{50} > 1$   $\mu$ M. (i) SGC-AAK1-1 inhibited the phosphorylation of the AP2M1 subunit at Thr156 in HEK293T cells in a concentration-dependent manner. HEK293T cells were treated with inhibitors for 2 hours before Western blot analysis. (j) Representative Western blot of HT1080 cells treated with indicated compounds (2.5  $\mu$ M) for one hour (left). Box and whisker plot represents quantification of four biological replicate experiments using LiCOR software (right). Data is representative of 4 biological replicates. (k) BAR luciferase assay of HT1080-B/R stable cells treated with WNT3A CM and the indicated dose of compound for 16 hours. Data are averaged over 3 technical replicates. (l) qPCR analysis of *AXIN2* or *NKD1* from HT1080 cells treated with indicated compound (1.25  $\mu$ M) for 12 hours in the presence of Lcell or WNT CM and normalized to *GAPDH*. Graph represents analysis averaged across 3 technical replicates. All panels: \*\*\*  $p < 0.0005$ , \*\*  $p < 0.005$ , \*  $p < 0.05$ . Data are representative of biological triplicates, unless otherwise noted. For complete statistics, see methods and materials.



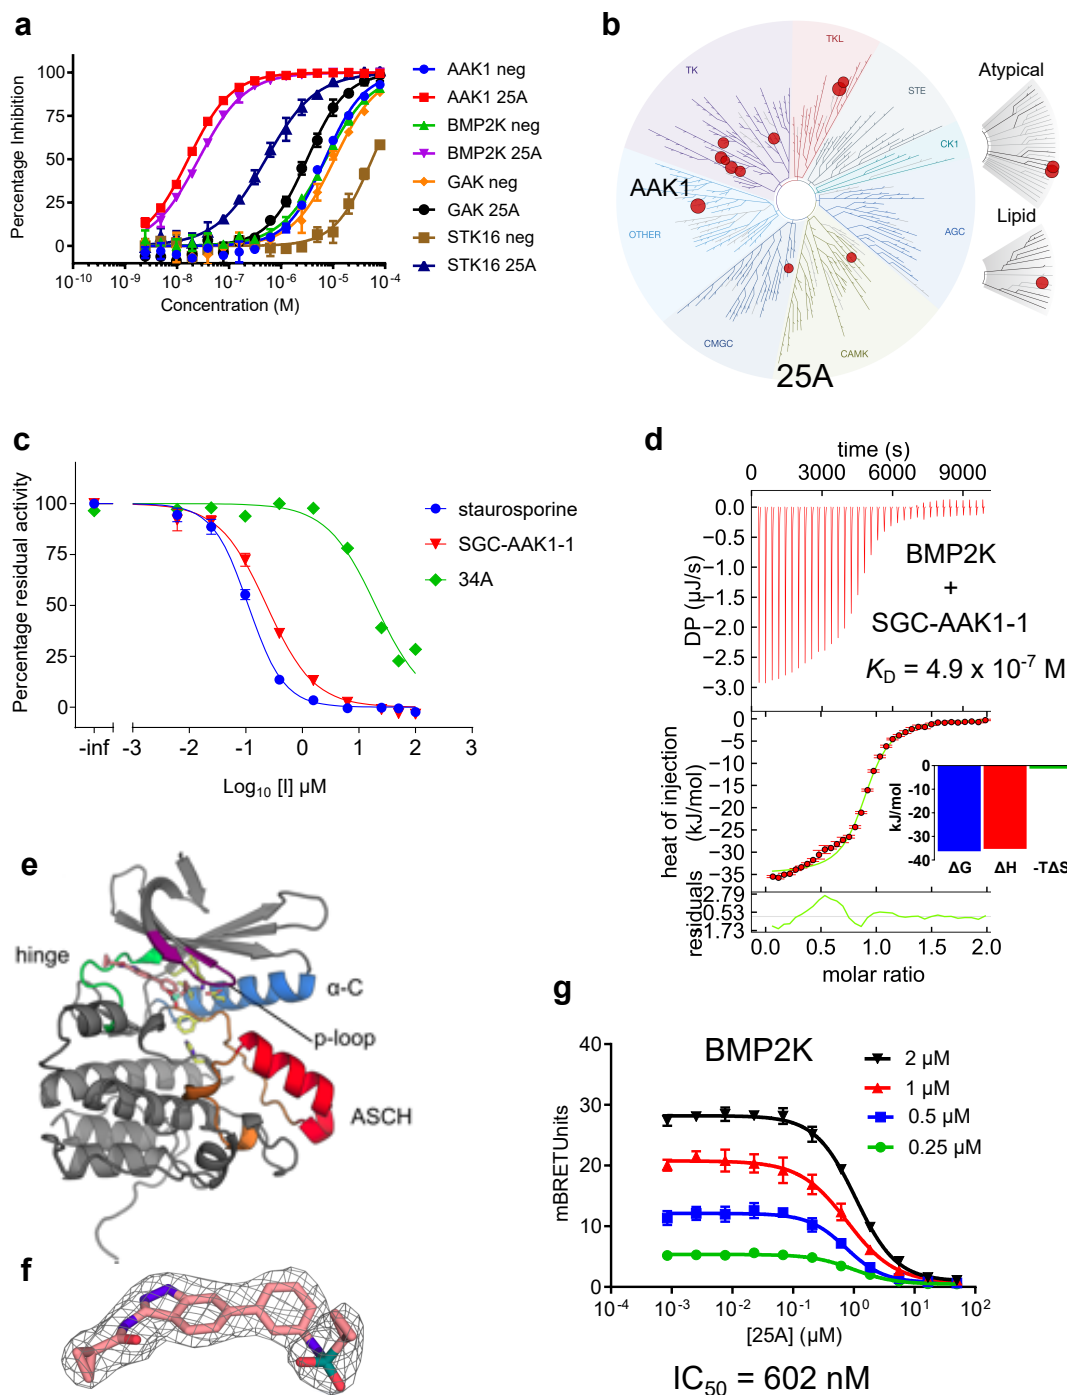

**Supplementary Figure 1 – SGC-AAK1-1 is a potent and specific inhibitor of AAK1 and BMP2K that is active in cells.** (a) Inhibitor 25A binds with high affinity to AAK1 and BMP2K but not to GAK and STK16 (related kinases from the same branch of the phylogenetic tree). Negative control compound 34A (illustrated as “neg”) does not bind to any of the kinases. The TR-FRET binding displacement assay was measured in duplicate. (b) Inhibitor 25A is most potent for AAK1 out of the 406 kinases tested and has good overall selectivity. (c) Inhibitor SGC-AAK1-1 inhibits AAK1 enzymatic activity in vitro with an  $IC_{50}$  of 233 nM at 46  $\mu$ M ATP, similar to that of the potent but non-specific inhibitor staurosporine. Negative control compound 34A had an  $IC_{50}$  of 20  $\mu$ M on AAK1. (d) SGC-AAK1-1 binds to BMP2K with weaker affinity than to AAK1, with a less favorable enthalpy of interaction. (e) The position of the inhibitor bound in the ATP binding site of BMP2K is shown. The Numb-associated-kinase-specific activation segment C-terminal helix (ASCH) is shown in red. (f) The inhibitor 25A is well resolved in the electron density. A 2Fo-Fc map is shown contoured at 1.0 $\sigma$ . (g) Inhibitor 25A binds to BMP2K in live HEK293T cells with an  $IC_{50}$  of 602 nM, derived from linear regression of the  $IC_{50}$  values at different concentrations of NanoBRET tracer. All experiments were performed in biological triplicates, unless otherwise noted. For complete statistical analysis, see methods and materials.

**Supplementary Table 3** – Isothermal Titration Calorimetry data for binding of AAK1 or BMP2K proteins to SGC-AAK1-1

|                                | AAK1  | BMP2K |
|--------------------------------|-------|-------|
| $K_D$ (nM)                     | 117.5 | 487.5 |
| $\Delta H$ (kJ/mol)            | -70.8 | -35.0 |
| $-T\Delta S$ (kJ/mol)          | 31.2  | -1.0  |
| Fraction of incompetent ligand | 0.28  | 0.11  |



**Supplementary Table 4** - Data collection and refinement statistics for the BMP2K co-crystal structure with inhibitor 25A.

|                                                                                               |                                   |
|-----------------------------------------------------------------------------------------------|-----------------------------------|
| PDB ID                                                                                        | 5IKW                              |
| Space group                                                                                   | <i>I</i> 222                      |
| Unit cell dimensions<br><i>a</i> , <i>b</i> , <i>c</i> (Å), $\alpha$ , $\beta$ , $\gamma$ (°) | 42.0, 111.2, 164.1,<br>90, 90, 90 |
| <b>Data collection</b>                                                                        |                                   |
| Resolution range (Å) <sup>a</sup>                                                             | 28.6-2.4<br>(2.5-2.4)             |
| Unique observations <sup>a</sup>                                                              | 81078 (7855)                      |
| Average multiplicity <sup>a</sup>                                                             | 5.3 (5.2)                         |
| Completeness (%) <sup>a</sup>                                                                 | 99.1 (95.2)                       |
| $R_{\text{merge}}$ <sup>a</sup>                                                               | 0.074 (0.49)                      |
| Mean $\langle(I)/\sigma(I)\rangle$ <sup>a</sup>                                               | 13.2 (3.1)                        |
| Mean CC(1/2)                                                                                  | 0.991 (0.482)                     |
| <b>Refinement</b>                                                                             |                                   |
| Resolution range (Å)                                                                          | 21.75-2.41                        |
| $R$ -value, $R_{\text{free}}$                                                                 | 0.18, 0.22                        |
| r.m.s. deviation from ideal<br>bond length (Å)                                                | 0.010                             |
| r.m.s. deviation from ideal<br>bond angle (°)                                                 | 1.04                              |
| Ramachandran Outliers                                                                         | 0                                 |
| Favoured                                                                                      | 98.3%                             |

<sup>a</sup> Values within parentheses refer to the highest resolution shell.

185 selectivity over a panel of 406 wild-type protein kinases at 1  $\mu$ M concentration (**Fig. 2c**,  
186 **Supplementary Fig. 1b, Supplementary Table 2**) with only a small number of other kinases  
187 inhibited with  $K_D$  values within 30x of those of AAK1. Isothermal titration calorimetry measured  
188  $K_D$  values for SGC-AAK1-1 of 120 nM and 490 nM against AAK1 and BMP2K respectively and  
189 showed that binding had favorable enthalpy and unfavorable entropy (**Fig. 2d, Supplementary**  
190 **Fig. 1c, Supplementary Table 3**). Attempts to co-crystallise either inhibitor with AAK1 were  
191 unsuccessful, but it was possible to obtain a co-crystal structure of 25A with BMP2K to 2.41 Å  
192 resolution (**Fig. 2e, Supplementary Fig. 1d,e,f, Supplementary Table 4**). The structure revealed  
193 25A bound in the ATP site, making three hydrogen bonds to the kinase hinge region and two  
194 further hydrogen bonds via its sulfonamide oxygens to Gln137 and Asn185, while the central  
195 hydrophobic portion of the inhibitor packs against the gatekeeper residue Met130. To test that the  
196 inhibitors engage AAK1 and BMP2K in live cells we used NanoBRET assays (Promega)<sup>29</sup>, in  
197 which human cells were transfected with a plasmid expressing the full-length kinase gene fused to  
198 Nanoluc luciferase. In the presence of a fluorescent-labelled ATP-competitive tracer compound a  
199 BRET signal was measured. Displacement of the tracer by the inhibitor being tested demonstrated  
200 target engagement, and linear regression of the  $IC_{50}$  values at multiple tracer concentrations  
201 yielded the  $IC_{50}$  in the absence of tracer. 25A and SGC-AAK-1 bound to AAK1 in HEK293T cells  
202 with  $IC_{50}$  values of around 240 nM, and more weakly to BMP2K, with  $IC_{50}$  values of 600 nM and  
203 1.5  $\mu$ M respectively (**Fig. 2f,g,h, Supplementary Fig. 1g**). To demonstrate that binding to AAK1  
204 inhibited its enzymatic activity in cells, phospho-AP2M1 (Thr156) levels were observed by  
205 Western blotting after 2 hour treatment of HEK293T cells with serially diluted SGC-AAK1-1,  
206 resulting in a dose-dependent decrease of pAP2M1 starting below 1  $\mu$ M in agreement with the  
207 NanoBRET data (**Fig. 2i**).

208 To confirm and extend these data, we next tested SGC-AAK1-1 and 25A in a series of  
209 experiments to evaluate its potency of AAK1 inhibition in cells and regulation of WNT signaling.  
210 First, we treated HT1080 cells with SGC-AAK1-1 and evaluated AAK1-dependent  
211 phosphorylation of AP2M1. SGC-AAK1-1, along with 25A, both significantly reduced  
212 phosphorylation of AP2M1 (T156), compared to controls, DMSO and 34A (**Fig. 2j**). Second,  
213 treatment with SGC-AAK1-1 or 25A activated WNT-driven BAR activity compared to controls  
214 (DMSO and 34A) in a dose-dependent manner (**Fig. 2k**). Importantly, 25A also significantly  
215 upregulated WNT target genes *AXIN2* and *NKDI* in HT1080 cells, as compared to DMSO control  
216 and 34A (**Fig. 2l**). Together, these results indicate that 25A and SGC-AAK1-1 block AAK1 kinase  
217 activity, resulting in increased WNT/ $\beta$ -catenin signaling.

218

### 219 **AAK1 promotes CME of LRP6 to inhibit WNT signaling**

220 Several recent studies report that CME negatively regulates WNT signaling by reducing  
221 the presence of the receptor complex on the plasma membrane<sup>18,20,22</sup>. Given the well-established  
222 role of AAK1 in phosphorylating AP2M1 to facilitate CME<sup>10,12-14</sup>, our discovery of AAK1 as a  
223 negative regulator of WNT signaling is not entirely unexpected. That said, AAK1 has not  
224 previously been shown to regulate WNT signaling, and certainly, the molecular mechanisms  
225 governing CME within the WNT pathway and its homeostasis are not well-defined, with several  
226 remaining questions and conflicting studies<sup>16-18,20,22-24</sup>. To confirm that AAK1 functions within  
227 membrane proximal steps of WNT signaling, we stabilized  $\beta$ -catenin protein levels with a GSK3 $\beta$   
228 inhibitor (CHIR99021) following either AAK1 over-expression or siRNA silencing. CHIR99021-  
229 mediated activation of the BAR reporter was not affected by AAK1 depletion or over-expression  
230 (**Fig. 3a**). As expected,  $\beta$ -catenin knockdown blocked BAR activation by AAK1 silencing

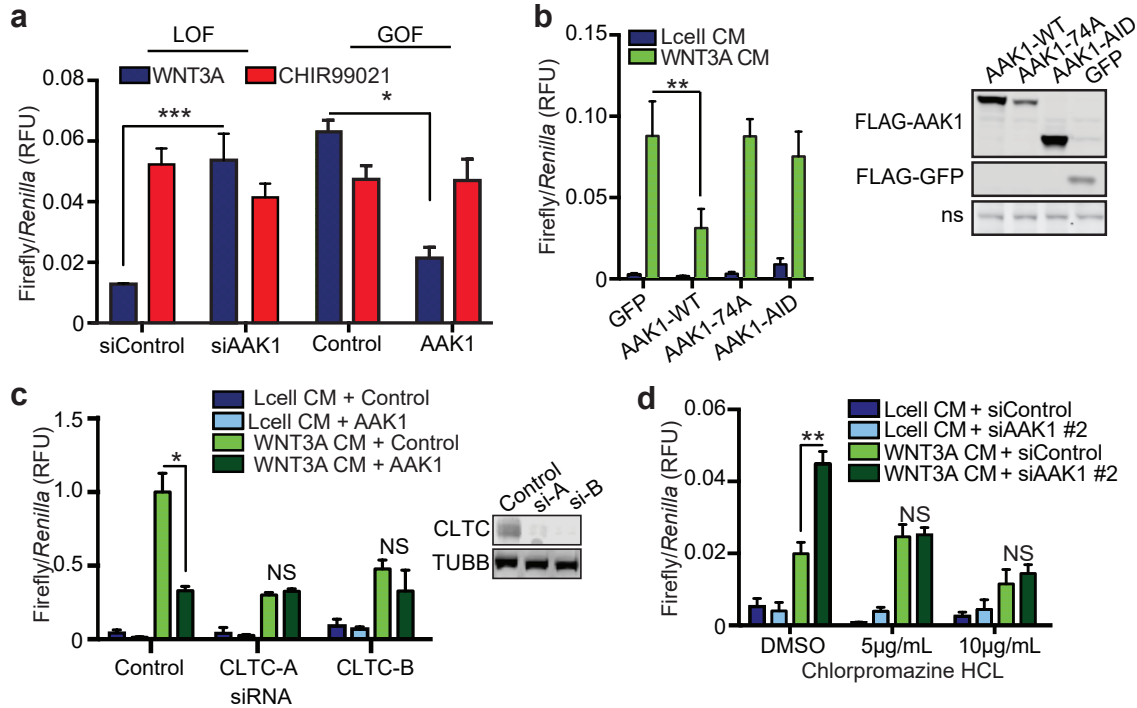

**Figure 3 - AAK1 represses  $\beta$ -catenin-mediated WNT signaling through regulation of endocytosis.** (a) HT1080-B/R cells were transfected with indicated siRNA for 56 hours and then treated with WNT3A or CHIR99021 (1  $\mu$ M) for 16 hours (left). HT1080-B/R cells were transfected with the indicated over-expression DNA construct and allowed to recover for 12 hours. Cells were then treated with WNT3A CM or CHIR99021 (1  $\mu$ M) for 16 hours (right). Data are averaged over 3 technical replicates. (b) BAR luciferase assay from HT1080 cells transiently transfected with BAR-firefly luciferase, TK-Ren, and the indicated expression constructs. Twelve hours post-transfection, cells were treated for 16 hours with Lcell or WNT3A CM and then assayed for BAR activity. Western blot of FLAG-AAK1 and FLAG-GFP is shown to illustrate expression of AAK1 constructs. Presented data is averaged across 3 technical replicates. (c) Luciferase assay in HT1080-B/R cells transfected with indicated siRNAs for 50 hours, then co-transfected with indicated expression constructs for 12 hours. Cells were then treated for 16 hours with either Lcell or WNT3A CM. Data are averaged over 3 technical replicates. Right panel shows Western blot of clathrin, indicating knockdown efficiency. (d) Luciferase assay of HT1080-B/R cells transfected with indicated siRNA for 56 hours, then treated as indicated for 16 hours. Data are averaged over 3 technical replicates. All panels: \*\*\*  $p < 0.0005$ , \*\*  $p < 0.005$ , \*  $p < 0.05$ . Data are representative of biological triplicates. For complete statistics, see methods and materials.

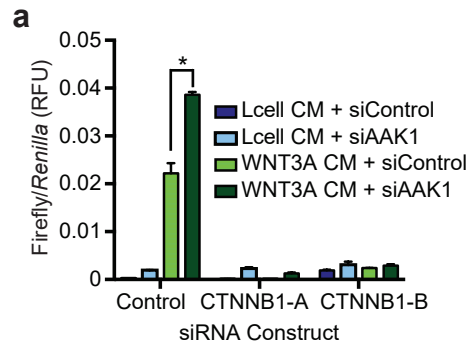

**Supplementary Figure 2 –  $\beta$ -catenin knockdown impairs AAK1 regulation of WNT signaling. (a)** Stable HT1080-B/R cells were transfected with the either  $\beta$ -catenin, AAK1 or control for 56 hours. Cells were then treated for 16 hours with WNT3A or Lcell CM. Bars represent average Firefly-/Ren (RFU) from 3 technical replicates  $\pm$  standard error (S.E.). Data are representative of biological triplicates. \*  $p < 0.05$ .

231 **(Supplementary Fig. 2a)**. These results indicate that AAK1 functions upstream of  $\beta$ -catenin and  
232 the destruction complex. Next, the role of endocytosis in AAK1-mediated repression of WNT  
233 signaling was evaluated using two AAK1 mutants: 1) AAK1-74A, which lacks kinase activity,  
234 and 2) AAK1-AID, which encodes a truncated form of AAK1 that cannot bind the AP2 complex<sup>12</sup>.  
235 Neither AAK1-74A nor AAK1-AID significantly repressed the BAR reporter (**Fig. 3b**), suggesting  
236 that both interaction and kinase activity are required for AAK1-mediated repression of WNT  
237 signaling. A role for clathrin and CME in AAK1-driven WNT suppression was tested by siRNA  
238 silencing of clathrin and by pharmacological inhibition clathrin-coated vesicles. Two non-  
239 overlapping clathrin siRNAs effectively silenced clathrin expression, and blocked AAK1-  
240 dependent suppression of the BAR reporter in HT1080 cells (**Fig. 3c**). Similarly, treatment with  
241 chlorpromazine, an established albeit promiscuous CME inhibitor<sup>17,30,31</sup>, suppressed WNT  
242 signaling induced by AAK1 silencing (Fig. 4D). These experiments suggest that AAK1 represses  
243 WNT signaling in a clathrin- and kinase-dependent manner.

244 We next examined the effect of AAK1 on LRP6 protein levels using cell surface  
245 biotinylation assays and flow cytometry. AAK1 over-expression decreased LRP6 protein levels at  
246 the plasma membrane (**Fig. 4a**). Additionally, AAK1 knockdown by siRNA increased LRP6  
247 surface expression levels (**Fig. 4b**). Based on the observation that total LRP6 levels seem to  
248 decrease with AAK1 knockdown (**Fig. 4b**), we quantified total LRP6 expression across 6  
249 biological replicates and demonstrate that with AAK1 knockdown, total LRP6 levels increase (**Fig.**  
250 **4c**). To validate the changes in surface LRP6 expression findings in an orthogonal platform, we  
251 used flow cytometry to quantify cell surface LRP6 levels in HEK293T cells. Here, AAK1 over-  
252 expression decreased LRP6 surface levels while AAK1 knockdown increased LRP6 surface levels  
253 (**Fig. 4d,e**). Together, these data indicate that AAK1 negatively regulates LRP6 abundance on the

254 plasma membrane. As such, we hypothesized that AAK1 and LRP6 co-complex. Using HEK293T  
255 cells, immunoprecipitation and Western blot analysis of HA-LRP6 protein complexes revealed the  
256 presence of over-expressed FLAG-AAK1 (**Fig. 4f**). Similarly, immunoprecipitation of HA-LRP6  
257 co-purified endogenous AAK1 and reciprocally, immunoprecipitation of over-expressed FLAG-  
258 AAK1 revealed co-complexed endogenous LRP6 (**Fig. 4g,h, respectively**). Finally,  
259 immunoprecipitation of endogenous AAK1 showed co-complexed endogenously expressed LRP6  
260 (**Fig. 4i**). Interestingly, WNT3A stimulation suppressed the association of LRP6 and AAK1 in all  
261 experiments (**Fig. 4f-i**).

262 AAK1 silencing potentiated WNT3A-driven  $\beta$ -catenin activation and increased LRP6  
263 protein levels in whole cell lysate and on the membrane (**Fig. 4b,c,e**). Because cargo targeted by  
264 clathrin-mediated endocytosis can be directed to lysosomes for degradation, we tested if the  
265 decreased LRP6 levels we observed following AAK1 over-expression was due to CME of LRP6  
266 and subsequent lysosomal degradation. AAK1 was over-expressed in HEK293T cells before  
267 treatment with bafilomycin A1, an inhibitor of lysosomal acidification. Western blot analysis  
268 established that bafilomycin A1 treatment rescued AAK1-driven downregulation of LRP6 (**Fig.**  
269 **4j**). Together, these results suggest that AAK1 inhibits WNT signaling by inducing CME  
270 endocytosis and lysosomal degradation of LRP6.

271

### 272 **WNT3A induces AAK1 phosphorylation of AP2M1**

273 Within 15-30 minutes of WNT3A treatment, LRP6 is phosphorylated by GSK3 $\beta$  and  
274 CK1 $\gamma$ , resulting in transient suppression of  $\beta$ -catenin phosphorylation and degradation<sup>3-6</sup>.  
275 Extended duration of WNT3A stimulation of 4 to 6 hours results in multivesicular body formation  
276 and sequestration of GSK3 $\beta$ <sup>23</sup>. Here we asked if WNT3A treatment regulated AAK1-dependent

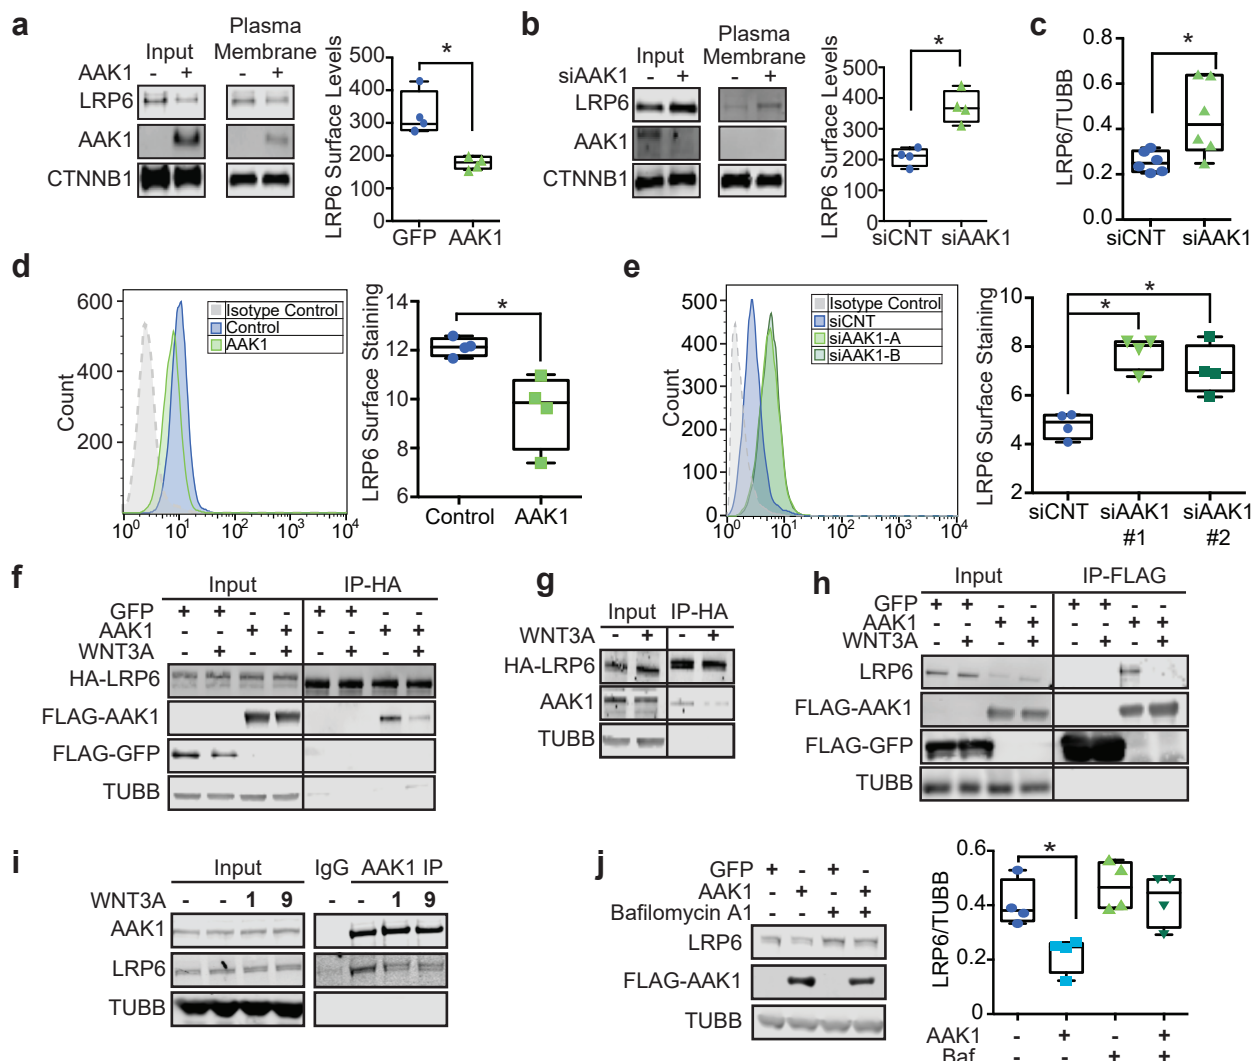

**Figure 4 - AAK1 represses LRP6 occupancy at the membrane.** (a,b) Western blot analysis of HEK293T cells transfected with an AAK1 over-expression construct for 24 hours (a) or AAK1 siRNA for 72 hours (b) prior to membrane fractionation using a surface biotinylation assay. Data represent average surface staining of four biological replicate experiments quantified by LiCOR software. (c) LiCOR quantification of Western blot analysis of LRP6 levels with AAK1 knockdown. The box and whisker plot represents total LRP6 expression normalized to  $\beta$ -tubulin (loading control) from six biological replicates quantified by LiCOR software. (d,e) LRP6 surface staining as detected by flow cytometry analysis in HEK293T cells transfected with an AAK1 over-expression construct for 24 hours (d) or an AAK1 siRNA construct for 72 hours (e). All experiments were quantified using FlowJo software. Experiment was performed in 4 biological replicates. (f) HEK293T cells were co-transfected with FLAG-AAK1 or control FLAG-hcRED and HA-LRP6 over-expression constructs. Twenty-four hours post-transfection, cells were treated with WNT3A CM for 1 hour. Western blot analysis of immunoprecipitated HA-LRP6. (g) HEK293T cells were transfected with HA-LRP6 for 24 hours and then treated with WNT3A CM for 1 hour. HA-LRP6 was immunoprecipitated, and the Western blot was probed for endogenous AAK1. (h) HEK293T cells were transfected with the FLAG-AAK1 or FLAG-GFP over-expression construct for 24 hours and then treated with WNT3A for 1 hour. IP of FLAG-AAK1 was conducted to visualize endogenous LRP6 as detected by Western blot. (i) Endogenous AAK1 IP in HEK293T cells treated as WNT3A CM for indicated times (untreated, 1, 9 hours) then endogenous LRP6 levels were visualized via Western blot analysis. (j) HEK293T cells were transfected with FLAG-AAK1 or FLAG-GFP over-expression constructs. Twenty-four hours post-transfection, cells were treated for 6 hours with the autophagy inhibitor, Bafilomycin A1 (100 nm) or DMSO control prior to cell harvest, then analyzed by Western blot for endogenous LRP6 and AAK1 levels. The box and whisker plot represents LRP6 expression normalized to  $\beta$ -tubulin from four biological replicates quantified by LiCOR software. All panels: Data are representative of biological triplicates, unless otherwise stated. \*  $p < 0.05$ . For complete statistical analysis, see methods and materials section.



277 phosphorylation of AP2M1. Time course analysis in HT1080 cells revealed WNT3A induced  
278 phosphorylation of AP2M1 at 8-10 hours post treatment, with no change in total AP2M1 or AAK1  
279 protein levels (**Fig. 5a**). To rule out artifacts due to the use of WNT3A conditioned media and to  
280 extend relevance to a second cell type, we treated HT1080 cells (**Supplementary Fig. 3a**) and  
281 HEK293T (**Supplementary Fig. 3c**) cells with recombinant human WNT3A (rhWNT3A) over a  
282 time course of 4 to 16 hours. Western blot analysis revealed an increase in pAP2M1 protein levels  
283 8-10 hours post WNT3A stimulation. Further, a pulse of WNT3A (15 minutes) induced a similar  
284 increase in AP2M1 phosphorylation as a prolonged WNT3A treatment (**Supplementary Fig. 3b**,  
285 **d**). The WNT3A-induced phosphorylation of AP2M1 required AAK1 expression and activity.  
286 First, HT1080 cells or HEK293T cells were treated with WNT3A CM and the AAK1 inhibitor,  
287 25A, before Western blot analysis of phosphorylated AP2M1 — 25A blocked WNT3A-induced  
288 phosphorylation of AP2M1 (**Supplementary Fig. 3b,d**). Second, siRNA silencing of AAK1  
289 similarly suppressed WNT3A-induced phosphorylation of AP2M1 (**Fig. 5b**). These data support  
290 a model where prolonged WNT3A treatment establishes an AAK1-driven negative feedback loop  
291 wherein CME of LRP6 decreases its abundance on the plasma membrane.

292 Intrigued with the delayed WNT3A-induced phosphorylation of AP2M1 by AAK1, we  
293 performed a series of functional assays to identify requisite signaling events. First, we found that  
294 AAK1-mediated pAP2M1 accumulation was induced by rhWNT3A (3A) and rhWNT5A (5A),  
295 the latter of which signals in a  $\beta$ -catenin-independent fashion (**Fig. 5c**). Second, inhibition of  
296 GSK3 $\beta$  with CHIR99021 did not result in elevated pAP2M1 levels, suggesting that WNT3A-  
297 induced pAP2M1 did not require  $\beta$ -catenin-dependent transcription (**Fig. 5d**). In agreement with  
298 these data, inhibiting WNT3A-dependent transcription with over-expressed dominant-negative  
299 TCF7L2/TCF4 (dnTCF7L2/dnTCF4) did not affect pAP2M1 accumulation (**Fig. 5e**). Third,

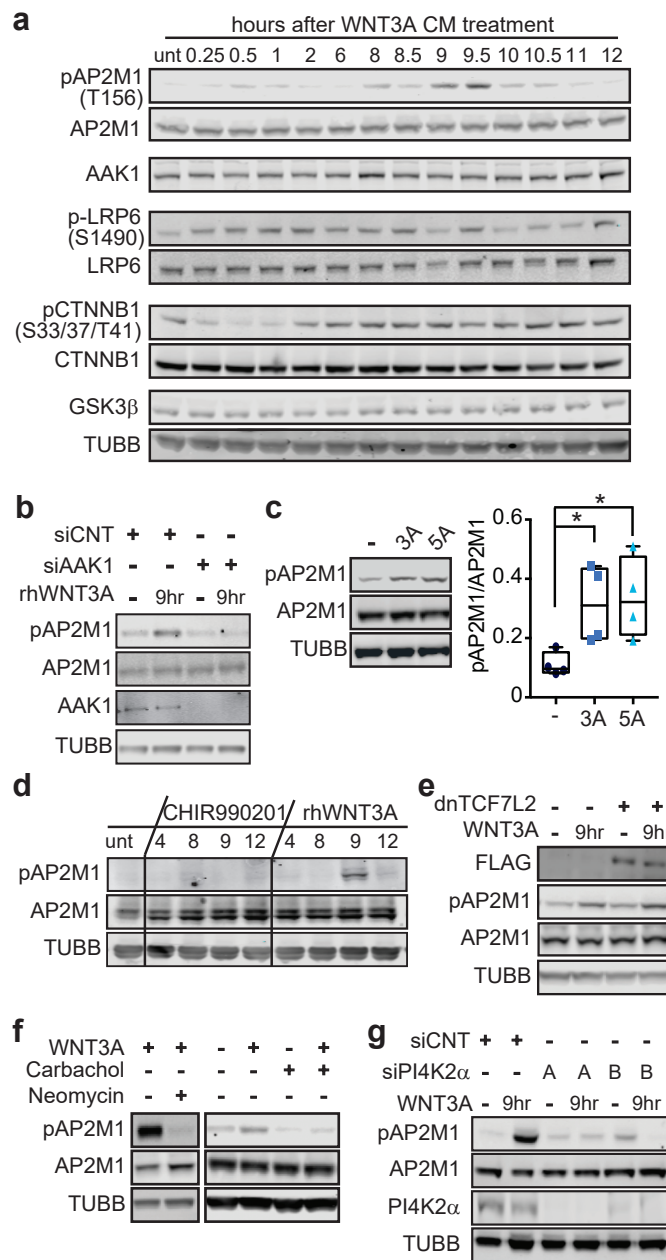

**Figure 5 – WNT treatment induces AAK1-, PIP2-dependent phosphorylation of AP2M1.** (a) Western blot analysis of HT1080 cells treated with WNT3A CM for indicated times. (b) Western blot analysis of HT1080 cells transfected with either AAK1 or control siRNA for 72 hours. Cells were then treated with rhWNT3A (200 ng/mL) for 15 minutes, then the media was changed for fresh, complete DMEM and cells were incubated for 9 hours. (c) Western blot analysis of pAP2M1 levels in HEK293T cells treated with either rhWNT3A (3A) or rhWNT5A (5A) (200 ng/mL) for 9 hours. The box and whisker plot represents phosphorylated LRP6/total LRP6 expression from four biological replicates quantified by LiCOR software. (d) Western blot analysis of HT1080 cells treated with either CHIR990201 compound (1 μM) or rhWNT3A (200 ng/mL) for the indicated time. (e) HEK-293T cells were transfected with FLAG-dnTCF4 for 24 hours. Cells were then treated with WNT3A for 15 minutes, then the media was changed for fresh, complete DMEM, incubated for 9 hours, and analyzed by western blot. (f) Western blot analysis of HT1080 cells treated with WNT3A CM for 15 minutes, then the media was changed for complete DMEM containing either carbachol (100 μM) or neomycin (100 μM). Cells were incubated for 9 hours prior to cell harvest. (g) Western blot analysis of HT1080 cells transfected with siRNA against PI4K2α for 72 hours and pulsed with WNT3A CM for 15 minutes and then incubated for 9 hours. All experiments were performed in biological triplicate.

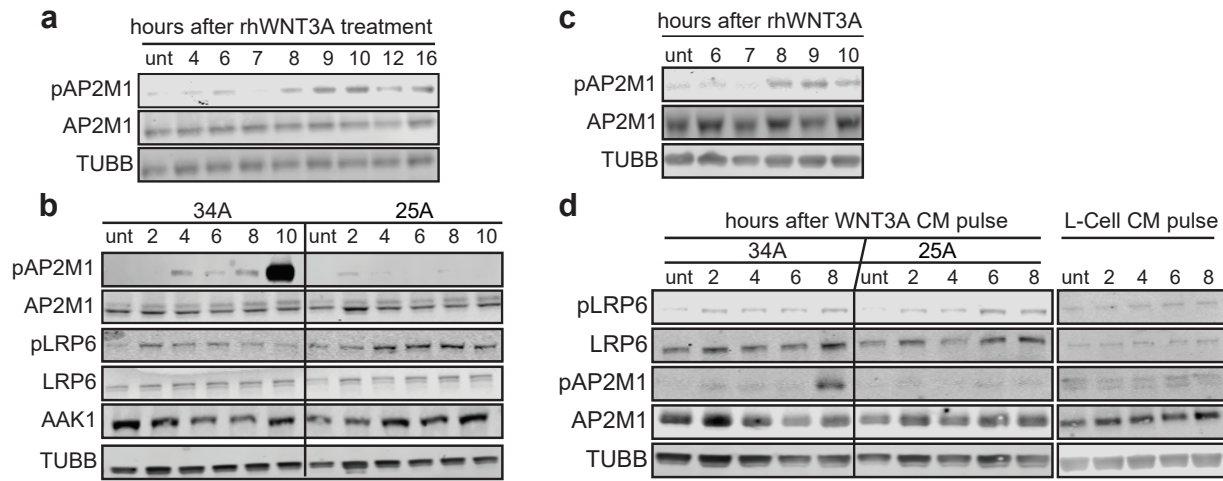

**Supplemental Figure 3 - WNT treatment induces AAK1 mediated phosphorylation of AP2M1.** (a) Western blot analysis of HT1080 cells treated with rhWNT3A (200 ng/mL) for indicated times. Data is representative of biological triplicates. (b) Western blot analysis of HT1080 cells stimulated with WNT3A CM for 15 minutes, then the media was replaced with complete DMEM. Cells were then treated with the AAK1 inhibitor, 25A, (1.25  $\mu$ M) or small molecule analog, 34A, (1.25  $\mu$ M) for the indicated times. (c) Western blot analysis of HEK293T cells treated with rhWNT3A (200 ng/mL) for indicated times. (d) Western blot analysis of HEK293T cells stimulated with WNT3A CM or Lcell CM for 15 minutes, then media was replaced for fresh, complete DMEM. Cells were then treated with the AAK1 inhibitor, 25A, (1.25  $\mu$ M) or small molecule analog, 34A, (1.25  $\mu$ M) for the indicated times. All experiments performed in biological triplicates.

300 previous studies established that PIP2 levels increase following short-term (4 hour) WNT3A  
301 treatment, and that PIP2 is required for LRP6 signalosome formation<sup>19,21</sup>. Further, PIP2 was shown  
302 to recruit AP2 to the signalosome, leading to clathrin-mediated endocytosis of LRP6<sup>19</sup>. Thus, we  
303 hypothesized that PIP2 is required for WNT3A-induced phosphorylation of AP2M1 by AAK1. To  
304 test this hypothesis, we inhibited PIP2 by treating cells with neomycin or carbachol, both of which  
305 block PIP2 signaling<sup>32,33</sup>. Treatment of HT1080 cells with neomycin or carbachol blocked  
306 WNT3A-induced phosphorylation of AP2M1 (**Fig. 5f**). Furthermore, we blocked PIP2 production  
307 by silencing the PI4K2 $\alpha$  kinase with 2 non-overlapping siRNAs. PI4K2 $\alpha$  phosphorylates  
308 phosphatidylinositol (PI) to phosphatidylinositol 4-phosphate (PI4P) and is required for  
309 subsequent PIP2 production<sup>34</sup>. In agreement with the neomycin or carbachol experiments, PI4K2 $\alpha$   
310 silencing in HT1080 cells blocked WNT3A-dependent increase in pAP2M1 (**Fig. 5g**). We  
311 conclude that WNT ligands drive AAK1-dependent phosphorylation of AP2M1 in a manner that  
312 is: 1) temporally-delayed from signalosome formation, 2) independent of  $\beta$ -catenin-mediated  
313 transcription and 3) dependent upon PIP2 production.

314

## 315 **DISCUSSION**

316 Clathrin-mediated endocytosis is a well-established regulator of WNT signaling, although  
317 whether CME promotes or inhibits the WNT pathway remains debated<sup>7,17,19-21,23,24</sup>. Certainly,  
318 contextual and temporal features in CME-directed WNT studies must be considered. As a central  
319 and positive regulator of CME, our discovery of AAK1 as a WNT modulator is of no surprise.  
320 Collectively our data show that AAK1 negatively regulates  $\beta$ -catenin-dependent WNT signaling  
321 through CME endocytosis of LRP6. Although the experiments have not yet been done, we  
322 speculate that Frizzled is similarly targeted by AAK1 and CME. In the course of our studies, we

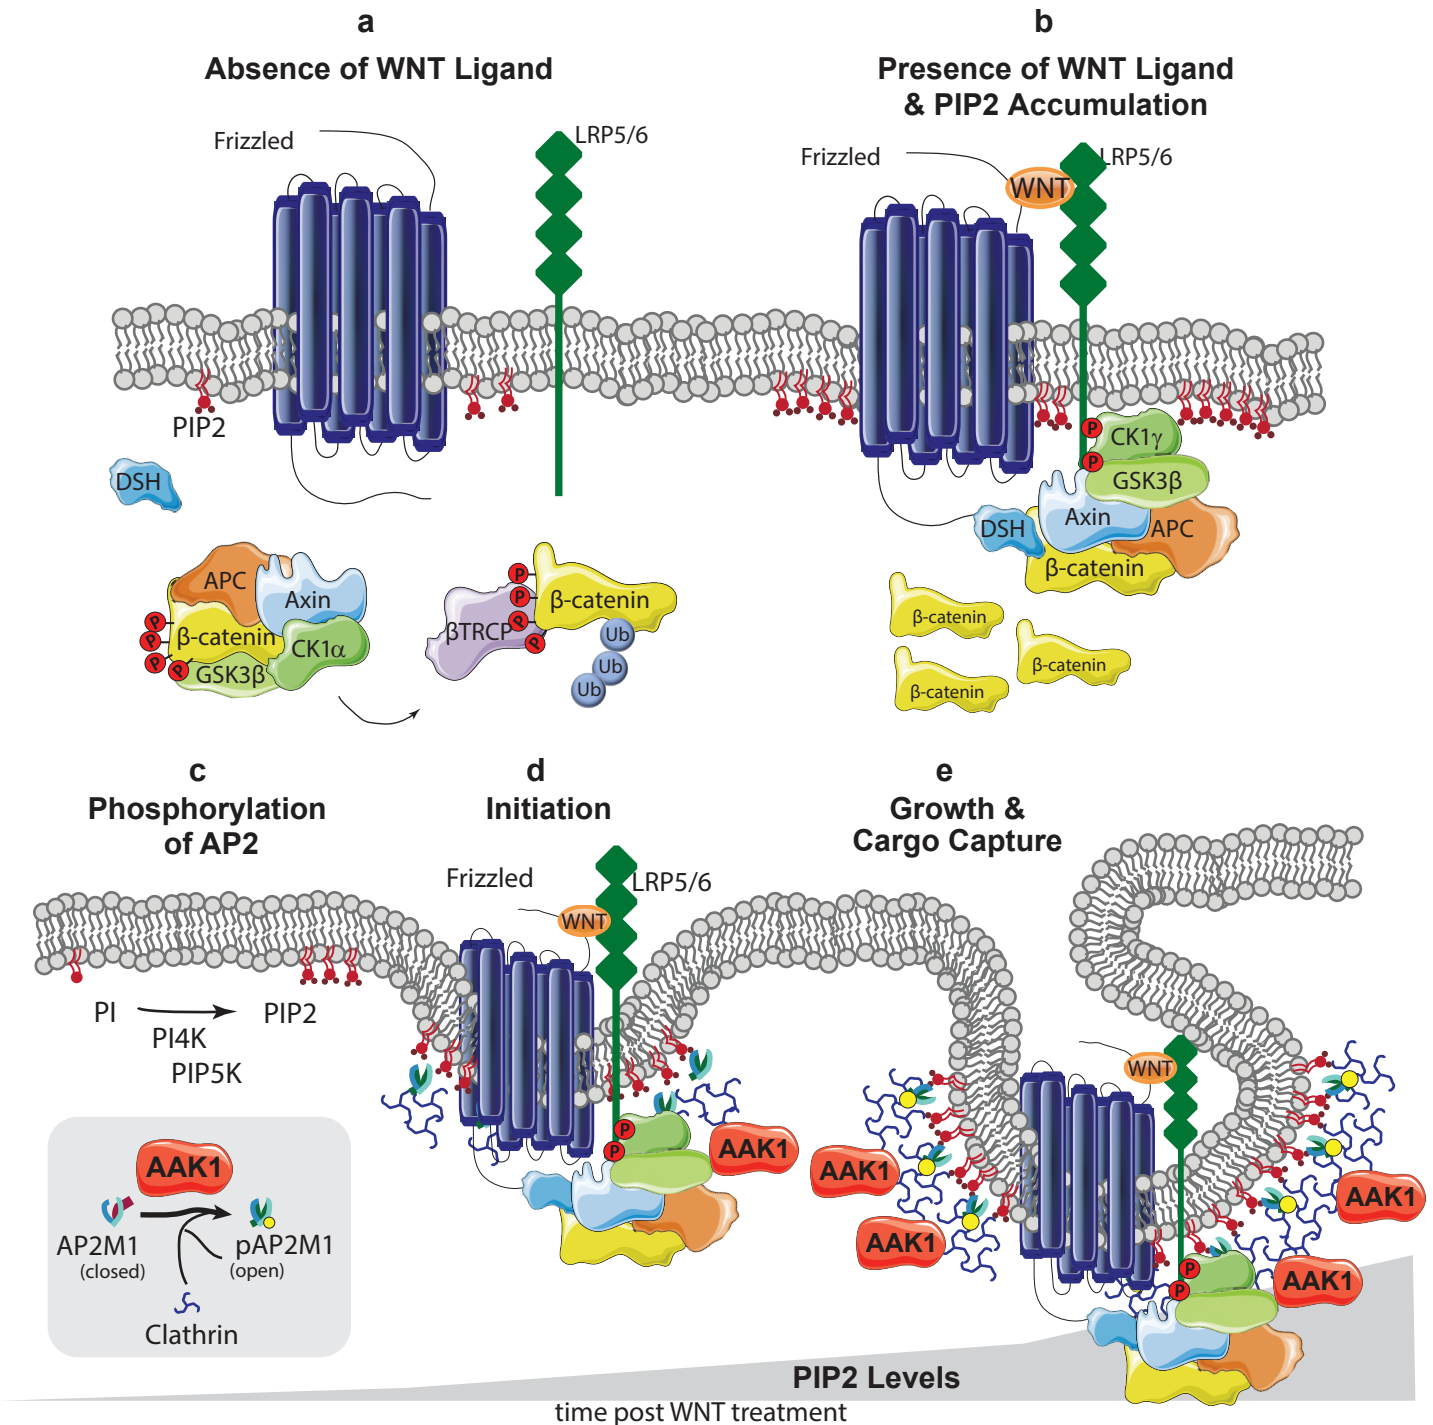

**Figure 6 – Proposed model for AAK1-dependent and clathrin-mediated endocytosis of LRP6.** (a) In the absence of WNT ligand, Frizzled and LRP5/6 remain dissociated, allowing for the formation of the destruction complex, leading to the phosphorylation, ubiquitination and degradation of  $\beta$ -catenin. PIP2 expression remains at low, basal levels. (b) In the presence of WNT ligand, Frizzled and LRP5/6 co-complex, allowing for recruitment of an alternate membrane associated complex, the LRP6 signalosome. This allows for the accumulation of  $\beta$ -catenin and activation of the WNT signaling pathway. Additionally, exposure to WNT ligand promotes the accumulation of PIP2. (c) Conversion of PI to PIP2 promotes an open conformation of AP2, potentiating clathrin binding. (d) We hypothesize that PIP2 levels continue to accumulate with longer WNT exposure. Phosphorylation of AP2M1 by AAK1 promotes binding to cargo sorting signals on LRP6, and enhances the growth and stabilization of clathrin-coated pits. (e) PIP2 levels accumulate to a specific threshold, driving AAK1 dependent AP2M1 phosphorylation. This results in growth of the clathrin-coated pit and cargo capture of the LRP6 signalosome, which undergoes CME and is ultimately degraded.

323 discovered an unexpected WNT-induced phosphorylation event on T156 of AP2M1. This was  
324 mediated by AAK1, and reproducibly occurred at 8-10 hours post WNT treatment. In Figure 8, we  
325 summarize our findings in a multi-step model that integrates WNT-driven signalosome formation,  
326 PIP2 production, AAK1, AP2M1 phosphorylation and CME of LRP6.

327 In the absence of WNT ligand, Frizzled and LRP6 remain dissociated, allowing for  $\beta$ -  
328 catenin phosphorylation, ubiquitylation and degradation (**Fig. 6a**)<sup>3,4</sup>. Within minutes of WNT  
329 stimulation, the LRP6 signalosome forms, resulting in transient repression of  $\beta$ -catenin  
330 phosphorylation by GSK3 $\beta$  (**Fig. 6b**)<sup>7</sup>. The newly formed LRP6 signalosome requires PIP2 for  
331 assembly and contains both clathrin and AP2 (**Fig. 6b**)<sup>21</sup>. Based on our data, we suggest that long-  
332 term (8-10 hours) WNT stimulation induces a spike in AAK1-dependent phosphorylation of T156-  
333 AP2M1. This promotes clathrin polymerization, clathrin-coated pit stabilization and ultimately  
334 CME of LRP6, thus constituting a WNT-driven and AAK1-dependent negative feedback loop.

335 Phosphoinositide is converted to PIP2 by PI4K2 $\alpha$  and PIP5K<sup>34</sup>. Importantly, PIP5K1  
336 association with the DIX domain of DVL1/2/3 results in activation of PIP5K1<sup>21,35</sup>. We hypothesize  
337 that through this mechanism, WNT-driven recruitment of DVL to the LRP/Frizzled receptor  
338 complex results in a time-dependent increase in local PIP2 production. PIP2 and cargo proteins  
339 allosterically activate the AP2 complex, thus driving clathrin polymerization and maturation of  
340 clathrin-coated pits (**Fig. 6c**)<sup>9,11</sup>. Phosphorylation of AP2M1 by AAK1 stabilizes the AP2 complex  
341 in an open/active conformation, promoting the binding of clathrin and cargo proteins and ultimately  
342 enhancing CME (**Fig. 6d**)<sup>13</sup>. Although we do not yet understand the mechanistic details, we  
343 speculate that PIP2 levels continue to rise hours after WNT stimulation, possibly triggering an  
344 increase in AAK1-dependent phosphorylation of AP2M1 and CME of LRP6 (**Fig. 6e**). Further  
345 studies that quantify PIP2 levels at 8-10 hours post WNT stimulation are needed. Alternatively,



346 the AP2 complex has been reported to cycle between phosphorylated and dephosphorylated states  
347 during CME and that this cycling is necessary for robust CME<sup>11</sup>. Therefore, it is possible that WNT  
348 stimulation shifts the AAK1/phosphatase balance to favor phosphorylated AP2M1. The molecular  
349 events suggested in this time-delayed model are consistent with the timing reported in the GSK3-  
350 sequestration model proposed by De Robertis and colleagues<sup>23</sup>.

351 Central to our model is the increase in phosphorylated AP2M1 levels at 8-10 hours post-  
352 WNT treatment. We found that phosphorylation of T156 in AP2M1 was AAK1-, PIP2- and WNT  
353 ligand-dependent, but independent of  $\beta$ -catenin-driven transcription. Consistent with this, we also  
354 show that the  $\beta$ -catenin-independent WNT ligand, WNT5A, similarly induces pT156-AP2M1. The  
355 physiological significance of accumulated pT156-AP2M1 hours after WNT treatment remains  
356 unclear. Although our studies employed various cell models receiving bolus administration of  
357 WNT ligand, we hypothesize that in certain developmental or disease contexts, WNT-induced  
358 pT156-AP2M1 may establish a negative feedback loop to remove LRP/Frizzled from the cell  
359 membrane.

360 The AP2 complex binds Yxx $\phi$  or dileucine motifs within the intracellular domains of  
361 transmembrane cargo proteins<sup>36,37</sup>. Through phosphorylation of T156-AP2M1, AAK1 was  
362 previously shown to promote association of the AP2 complex with cargo<sup>10</sup>. Interestingly, in co-  
363 immunoprecipitation experiments, we discovered an association between AAK1 and LRP6. AP2  
364 interacts with LRP6 through a conserved Yxx $\phi$  motif, which is required for LRP6 signalosome  
365 formation<sup>19,24</sup>. Thus, it is possible that the AAK1-LRP6 co-complex reported here requires AP2  
366 as a bridge. We also report that the AAK1-LRP6 co-complex dissolves following treatment with  
367 WNT3A. While further experimentation is needed to define the dynamics of protein-protein

368 interactions during CME of LRP6, it is possible that following AAK1-dependent phosphorylation  
369 of AP2M1, AAK1 dissociates from the LRP6/AP2 complex.

370 AAK1 contributes to several neurological disorders, including neuropathic pain,  
371 Alzheimer's Disease, Parkinson's Disease, schizophrenia and Amyotrophic Lateral Sclerosis<sup>38,39</sup>.  
372 AAK1 has a described role in dendrite branching and spine development<sup>40</sup>, and through the  
373 regulation of Neuregulin1/ErbB4, AAK1 has been linked to schizophrenia<sup>41</sup>. Just recently, the  
374 LX9211 AAK1 inhibitor entered phase 1 clinical trials for neuropathic pain. Here we report the  
375 development of a potent and selective AAK1 pharmacological inhibitor (SGC-AAK1-1). SGC-  
376 AAK1-1 demonstrates improved biochemical selectivity over the phase 1 clinical agent LX9211  
377 and is confirmed to be cell active. Thus, we report the best available chemical tool to study  
378 AAK1/BMP2K pathways and related biology. Like the lead compound 25A, SGC-AAK1-1  
379 inhibited AAK1-dependent phosphorylation of AP2M1 and activated WNT signaling. Looking  
380 forward, *in vitro* and *in vivo* neural-directed studies of SGC-AAK1-1 and its comparison with  
381 LX9211 are needed. Further, while we describe a role for AAK1 in negatively regulating WNT  
382 signaling, AAK1 also inhibits Neuregulin1/ErbB4 and positively regulates the NOTCH  
383 pathway<sup>41,42</sup>. Therefore, AAK1 inhibitors may also regulate these signaling cascades and  
384 consequently prove therapeutically beneficial in diseases with misregulated NOTCH or  
385 Neuregulin1/ErbB4 signaling.

386

387

## 388 **MATERIALS AND METHODS**

389 **Cell lines and tissue culture:** All cells were cultured at 37 °C and 5% CO<sub>2</sub>. HT1080, HEK293T,  
390 RKO, Lcells, and WNT3A expressing Lcells were obtained from American Type Culture



391 Collection (ATCC) (Manassas, VA) and grown in DMEM with 10% FBS. Each cell line was  
392 routinely tested for contamination and passaged no more than 20 passages from the original ATCC  
393 stock. Cells were treated at the indicated concentrations with the following compounds:  
394 CHIR99021 (Cayman Chemicals), chlorpromazine HCL (Sigma-Aldrich), bafilomycin A1  
395 (Cayman Chemicals), rhWNT3A (PeproTech), rhWNT5A (R&D), neomycin trisulfate salt  
396 hydrate (Sigma-Aldrich) and carbachol (EMD Chemicals).

397  
398 **WNT3A conditioned media:** Conditioned media was collected as described by ATCC. Briefly,  
399 WNT3A and control Lcells were grown to 100% confluency before fresh media was added,  
400 conditioned for 48 hours, then collected.

401  
402 **DNA constructs and siRNAs:** The human kinase open reading frame library was obtained from  
403 Addgene (cat# 1000000014) and cloned into a custom pHAGE-CMV-FLAG vector using  
404 Gateway cloning technology. All constructs were N-terminally sequence verified. Wild type  
405 AAK1 and mutants were a gift from Dr. Sean Conner (University of Minnesota). GFP-LRP6, HA-  
406 LRP6, ANKRD6, and FLAG-dnTCF7L2 were kindly provided by Dr. Randell Moon (University  
407 of Washington). ADCK1, ADCK2, MAST1, and TGFBR3 were obtained as part of the kinome  
408 library from Addgene. All siRNAs were obtained from Life Technologies (ThermoFisher,  
409 Waltham, MA), and sequences are provided in Supplementary Table 5.

410  
411 **Transcriptional reporter assays:** All luciferase reporter assays and IncuCyte fluorescent reporter  
412 assays were performed as previously described<sup>26</sup>. Firefly luciferase and the *Renilla* (*Ren*) control  
413 were detected using the Promega Dual-Luciferase Reporter Assay System per the manufacturer's

414 protocol (Promega). Plates were read on the EnSpire plate reader from PerkinElmer. For IncuCyte  
415 fluorescent reporter assays, stable BAR-mCherry cells were treated and imaged as indicated using  
416 the IncuCyte Live Cell Analysis System from Essen BioScience. For loss-of-function assays, cell  
417 lines stably expressing the BAR-Firefly luciferase reporter and TK-*Ren* luciferase were used and  
418 transfected with RNAiMAX (Life technologies, ThermoFisher) for 72 hours. For gain of function  
419 studies, the BAR-reporter (20 ng), TK-*Ren* (10 ng), and indicated constructs (70 ng) were  
420 transfected with TansIT2020 (Mirus Bio) for 24 hours. Luciferase readouts were normalized using  
421 internal mCherry control and co-transfected TK-*Ren*.

422  
423 **Real-Time Quantitative PCR:** Quantitative PCR (qPCR) was performed as described  
424 previously<sup>26</sup>. Briefly, cells were treated as indicated and RNA was collected using PureLink RNA  
425 Mini Kit (Invitrogen). cDNA was generated from 1ug of RNA using the iScript cDNA Synthesis  
426 Kit (BioRad) following kit specifications. qPCR was performed using Fast SYBER Green Master  
427 Mix (Applied Biosystems) on the Applied Biosystems 7400HT following manufacturer  
428 specifications. Primers are listed in Supplementary Table 5, and were published previously<sup>26</sup>.

429  
430 **Immunoprecipitation and immunoblotting:** Immunoprecipitation experiments were performed  
431 as previously described<sup>18</sup>. Standard Western blotting techniques were utilized. All images were  
432 obtained using a LiCOR Odyssey imager and quantified with LiCOR software. For Western blot  
433 analysis, all antibodies were used at a concentration of 1:1000, with the exception of loading  
434 controls, which were used at 1:10,000. Antibodies used were as followed: Bethyl Labs  
435 (Montgomery, TX) – AAK1 (A302-146a); Cell Signaling (Danvers, MA) – CD44 (13113),  
436 Clathrin (4796), LRP6 (3395), phospho-LRP6 (S1490) (2568), phospho-AP2M1 (T156) (7399S),

## Supplementary Table 5 – siRNA and primer sequences

### siRNA Sequences

| Target               | Sequence                            |
|----------------------|-------------------------------------|
| <b>AAK1 - 1</b>      | CAAGAAUAUUGUGGGUUAUCAUUGAU          |
| <b>AAK1 - 2</b>      | GAGCCGUCUCAAGUUUAAACUUACA           |
| <b>ANKRD6</b>        | CCAGAAGAACCUGCAUGCUCAUAAU           |
| <b>β-CATENIN - A</b> | CUA UCU GUC UGC UCU AGU A [dT] [dT] |
| <b>β-CATENIN - B</b> | CUG UUG GAU UGA UUC GAA A [dT] [dT] |
| <b>CLTC - 637</b>    | GAGUGCUUUGGAGCUUGUCUGUUUA           |
| <b>CLTC - A</b>      | CCGCCUUGCAGAGUUAGAAGAAUUU           |
| <b>LRP6</b>          | GAUCCCAUGGUUGGGUACAUGUAU            |
| <b>PI4KIIA - 1</b>   | GGATCATTGCTGTCTTCAA                 |
| <b>PI4KIIA - 2</b>   | GGAAGAGGACCTATATGAA                 |
| <b>ZNRF3</b>         | UGGUGAAGCUGGAACAGCCAGAAU            |
| <b>CONTROL - A</b>   | CGU ACG CGG AAU ACU UCG ATT         |
| <b>CONTROL - B</b>   | UCG AAG UAU UCC GCG UAC GTT         |

### Primer Sequences

| Gene target  | Fwd primer              | Rev primer             |
|--------------|-------------------------|------------------------|
| <b>AXIN2</b> | GCGATCCTGTTAATCCTTATCAC | AATTCCATCTACACTGCTGTC  |
| <b>NKD1</b>  | GGAGAGAGTGAGCGAACCCCT   | CTTGCCGTTGTTGTCAAAGTC  |
| <b>GAPDH</b> | ATGGGGAAGGTGAAGGT       | AAGCTTCCCGTTCTCAG      |
| <b>ACTB</b>  | AGGCCAACCGCGAAGATGACC   | GAAGTCCAGGGCGACGTAGCAC |

437 PIP4K2A (5527), phospho-CTNNB1 (S33/37/T41) (9561S); Sigma-Aldrich – FLAG M2 (F3165),  
438 HA (11867423001), and beta-tubulin (T8328); Abcam (Cambridge, UK) – LRP6 (ab75358),  
439 AP2M1 (ab7995), BD Biosciences (San Jose, CA) – CTNNB1 (163510), GSK3 $\beta$  (610201); Santa  
440 Cruz (Dallas, TX) – DVL3 (sc-8027). Secondary antibodies were used at 1:5000 dilution and  
441 purchased from LiCOR Biosciences. Specific antibodies used are as follows: IRDye® 800CW  
442 Goat anti Mouse IgG (925-32210), IRDye® 680LT Goat anti Mouse IgG (925-68020),  
443 IRDye®800CW Goat anti Rabbit IgG (925-32211), and IRDye® 680LT Goat anti Rabbit (925-  
444 68021).

445

#### 446 **Dose-response measurement of SGC-AAK1-1 inhibition of pAP2 formation**

447 AP2M1 T156 phosphorylation levels were measured after 2 hour treatment with SGC-AAK1-1 at  
448 different concentrations or 10  $\mu$ M 34A. HEK293T cells were plated in a 96-well plate ( $1.5 \times 10^5$   
449 cells/well) and the next day they were treated with the compounds for 2 hours, followed by protein  
450 extraction with RIPA buffer with protease and phosphatase inhibitors and analysis via SDS-PAGE.  
451 Antibodies used were as follows: AP2M1 (Invitrogen, #PA5-21360), p-AP2M1 (Thr156) (Abcam  
452 #ab109397) and  $\beta$ -actin (Santa Cruz #sc-47778). All antibodies were used at 1:1000 dilution.

453

454 **Surface staining of LRP6:** HEK293T cell were transfected for 48 hours prior to splitting into 60  
455 cm plates with 400,000 cells/plate and allowed to attach overnight. Cells were disassociated with  
456 0.5 mM EDTA in DPBS and washed with FACS Buffer (2% FBS in DPBS). Cells were stained  
457 in FACS buffer for 1 hour at on ice using 5  $\mu$ g/mL LRP6 antibody (R&D) or Isotype Control  
458 (R&D) and secondary staining with 1:100 anti-mouse PE (Jackson Immunoresearch) for 45

459 minutes. After staining, cells were fixed with 2% paraformaldehyde in FACS buffer and analyzed  
460 by the UNC-Flow Cytometry Core.

461  
462 **Surface biotinylation:** For surface biotinylation assays, the Pierce Cell Surface Protein Isolation  
463 Kit (ThermoFisher) was utilized and manufacturer specifications were followed. Briefly, cells  
464 were grown to 70% confluency, washed 3 times with cold PBS, and then biotinylated for 30  
465 minutes at 4 °C with NHS-SS-sulfo-linked biotin (0.25mg/mL). The free biotin was quenched, and  
466 then the samples were washed 3 times with cold TBS prior to lysis and sonication. Lysates were  
467 cleared and then incubated with Streptavidin beads (GE Healthcare) for 1 hour at 4 °C with  
468 nutation. Beads were washed 4 times with cold TBS and then proteins were eluted with LDS  
469 protein loading buffer supplemented with DTT at 95 °C for 10 minutes.

470  
471 **Chemistry general procedures:** Reagents were purchased from commercial suppliers and used  
472 without further purification. <sup>1</sup>H and <sup>13</sup>C NMR spectra were collected in methanol-*d*<sub>4</sub> and recorded  
473 on Varian Inova 400 or Inova 500 spectrometers. Peak positions are given in parts per million  
474 (ppm) downfield from tetramethylsilane as the internal standard; J values are expressed in hertz.  
475 Thin-layer chromatography (TLC) was performed on silica gel F254 to evaluate reaction courses  
476 and mixtures. Flash chromatography was performed on Merck 60 silica gel (0.063–0.200 mm).  
477 All non-aqueous reactions were performed under nitrogen atmosphere. Solutions containing the  
478 final products were dried over Na<sub>2</sub>SO<sub>4</sub> before filtration and concentration under reduced pressure  
479 using a rotary evaporator.

480

481 **N-(6-(3-((N,N-diethylsulfamoyl)amino)phenyl)-1H-indazol-3-yl)cyclopropanecarboxamide**  
482 **(SGC-AAK1-1):** 3-Aminophenylboronic acid pinacol ester (1 eq., 50 mg, 0.228 mmol) in pyridine  
483 (1.2 mL) was cooled to 0 °C in an ice bath. Diethylsulfamoyl chloride (2.06 eq., 80.7 mg, 0.0754  
484 mL, 0.47 mmol) was added drop wise, and the reaction mixture was stirred overnight. The reaction  
485 progress was checked by TLC, revealing complete consumption of starting material (SM). Solvent  
486 was removed and the residue was partitioned between dichloromethane and saturated aqueous  
487 sodium bicarbonate solution. The organic phase was dried (Na<sub>2</sub>SO<sub>4</sub>), filtered and concentrated.  
488 The residue was purified using an Isco Combiflash companion automated purification system (4g  
489 (18 mL/min), SiO<sub>2</sub>, 80%/20% to 25%/75% heptanes/EtOAc) to give diethyl({[3-(tetramethyl-  
490 1,3,2-dioxaborolan-2-yl)phenyl]sulfamoyl})amine as an orange solid (44 mg, 54%), which was  
491 determined to be desired product by <sup>1</sup>H NMR.

492 The following was added to a microwave vial: N-(6-bromo-1H-indazol-3-  
493 yl)cyclopropanecarboxamide (1 eq., 20 mg, 0.0677 mmol), diethyl({[3-(tetramethyl-1,3,2-  
494 dioxaborolan-2-yl)phenyl]sulfamoyl})amine (1 eq., 24 mg, 0.0677 mmol), and Pd(dppf)Cl<sub>2</sub> (10%,  
495 4.96 mg, 0.00677 mmol) in a mixture of dioxane (0.19 mL) and 1M aq sodium carbonate (0.16  
496 mL). The vial was capped and heated in the microwave at 120 °C for 30 minutes. Once cool, the  
497 reaction progress was examined by TLC, which revealed complete consumption of SM. The  
498 mixture was filtered through Celite and washed with EtOAc (ethyl acetate). The combined organic  
499 solution was washed with brine, dried (Na<sub>2</sub>SO<sub>4</sub>), filtered and concentrated. The residue was  
500 purified using an Isco Combiflash companion automated purification system (4g (18 mL/min),  
501 SiO<sub>2</sub>, 75%/25% to 20%/80% heptanes/EtOAc) to give **SGC-AAK1-1** as a yellow solid (14.3 mg,  
502 49%): <sup>1</sup>H NMR (400 MHz, Methanol-*d*<sub>4</sub>) δ 7.80 (d, *J* = 0.8 Hz, 1H), 7.58 (s, 1H), 7.48 (dt, *J* = 0.8,  
503 2.1 Hz, 1H), 7.38 – 7.35 (m, 2H), 7.33 (d, *J* = 8.5 Hz, 1H), 7.17 – 7.12 (m, 1H), 3.29 (d, *J* = 1.6

504 Hz, 4H), 1.91 (tt,  $J = 4.5, 8.0$  Hz, 1H), 1.05 (t,  $J = 7.1$  Hz, 6H), 1.01 (dt,  $J = 3.0, 4.4$  Hz, 2H), 0.95  
505 – 0.88 (m, 2H);  $^{13}\text{C}$  NMR (101 MHz, Methanol- $d_4$ )  $\delta$  174.1, 142.1, 141.9, 139.8, 139.0, 129.1,  
506 122.2, 121.6, 119.7, 118.3, 118.1, 107.5, 48.2, 41.6, 13.5, 12.5, 6.8.

507

508 **General procedure for preparation of 3-acylamino-6-bromoindazoles:** To a solution of 6-  
509 bromo-1H-indazol-3-amine (48 mg, 0.23 mmol) in pyridine (0.75 mL) was added  
510 cyclopropanecarboxylic acid chloride (0.021 mL, 0.23 mmol, 1 eq.) drop wise at 0 °C. The  
511 reaction mixture was stirred at this temperature for 4 hours and then allowed to warm to room  
512 temperature. Once the reaction was complete the solvent was removed under reduced pressure.  
513 The residue was then dissolved in N,N-dimethylformamide and water was added drop wise. The  
514 precipitated solid was then washed with hexanes 3 times and further dried to afford *N*-(6-bromo-  
515 1H-indazol-3-yl)cyclopropanecarboxamide (40.4 mg, 64% yield).

516

517 **General procedure for 3-acylamino-6-arylidazoles:** The following was added to a microwave  
518 vial: *N*-(6-bromo-1H-indazol-3-yl)cyclopropanecarboxamide (344 mg, 1.12 mmol) dissolved in  
519 dioxane (4mL) and 1M  $\text{Na}_2\text{CO}_3$  (1mL). To this solution, the following was added: 3-  
520 aminophenylboronic acid pinacol ester (269 mg, 1.12 mmol, 1.0 eq.), Pd(dppf) $\text{Cl}_2$  (100.3 mg,  
521 0.123 mmol, 0.1eq.). The reaction was run in the microwave at 160 °C for 20 minutes, at which  
522 time SM was consumed. The reaction mixture was poured into water and extracted 3 times with  
523 EtOAc. The combined organic layers were dried over  $\text{Na}_2\text{SO}_4$  and concentrated to dryness. The  
524 compound was then purified by flash chromatography to afford *N*-(6-(3-aminophenyl)-1H-  
525 indazol-3-yl)cyclopropanecarboxamide (100 mg, 28% yield).

526

527 ***N*-(6-(3-(cyclopropanesulfonamido)phenyl)-1*H*-indazol-3-yl)cyclopropanecarboxamide**

528 **(25A):** To a solution of *N*-[6-(3-aminophenyl)-1*H*-indazol-3-yl]cyclopropanecarboxamide (67mg,  
529 0.2292 mmol) in pyridine (1mL) cooled to 0 °C, cyclopropanesulfonyl chloride (1eq, 32.22mg,  
530 0.2292 mmol) was added drop wise. The reaction mixture was stirred at 0 °C for 4 hours and  
531 warmed to room temperature. After verification by LC/MS that SM had been consumed, solvent  
532 was removed under reduced pressure. The compound was then purified by high pressure liquid  
533 chromatography (HPLC) from 10% to 100% ACN/water + 0.05% TFA to yield **25A** (44.5 mg,  
534 49% yield). <sup>1</sup>H NMR (400 MHz, Methanol-*d*<sub>4</sub>) δ 7.83 – 7.78 (d, *J* = 8.6 Hz, 1H), 7.61 – 7.54 (m,  
535 2H), 7.46 – 7.30 (m, 3H), 7.29 – 7.23 (ddd, *J* = 7.7, 2.2, 1.3 Hz, 1H), 2.62 – 2.49 (tt, *J* = 8.0, 4.8  
536 Hz, 1H), 1.95 – 1.84 (ddd, *J* = 12.5, 7.9, 4.2 Hz, 1H), 1.07 – 0.77 (m, 8H). <sup>13</sup>C NMR (126 MHz,  
537 Methanol-*d*<sub>4</sub>) δ 5.8 (2C), 8.4 (2C), 15.0, 30.5, 30.8, 109.1, 117.2, 121.2, 121.3, 121.4, 123.1, 124.7,  
538 130.8, 140.1, 141.2, 143.4 (2C), 143.8, 175.6. MS+ (– ES API) - 397.1.

539

540 ***N*-(6-(3-(cyclopropanesulfonamido)phenyl)-1*H*-indazol-3-yl)isobutyramide (SGC-AAK-**

541 **1N):** <sup>1</sup>H NMR (400 MHz, Methanol-*d*<sub>4</sub>) δ 7.82 – 7.75 (d, *J* = 8.6 Hz, 1H), 7.62 – 7.54 (dt, *J* = 10.9,  
542 1.5 Hz, 2H), 7.47 – 7.31 (m, 3H), 7.31 – 7.22 (ddd, *J* = 7.8, 2.2, 1.3 Hz, 1H), 2.84 – 2.69 (hept, *J*  
543 = 6.8 Hz, 1H), 2.61 – 2.50 (tt, *J* = 8.0, 4.8 Hz, 1H), 1.29 – 1.15 (d, *J* = 6.8 Hz, 6H), 1.14 – 0.82  
544 (m, 4H). <sup>13</sup>C NMR (126 MHz, Methanol-*d*<sub>4</sub>) δ 5.8 (2C), 20.0 (2C), 30.5, 36.3, 109.2, 117.4, 121.3,  
545 121.4 (2C), 123.0, 124.7, 130.8, 140.1, 141.2, 141.3, 143.4, 143.8, 179.3. MS+ (– ES API) - 399.1.

546

547 **Cloning, protein expression and purification:** For crystallization of BMP2K, a construct of  
548 BMP2K residues 38-345 (NCBI NP\_942595) encompassing the kinase domain with surface  
549 mutations K320A and K321A in expression vector pNIC-Zb was used<sup>43</sup>. The construct was



550 transformed into BL21(DE3) cells that co-express  $\lambda$ -phosphatase and three rare tRNAs (plasmid  
551 pACYC-LIC+). The cells were cultured in TB medium containing 50  $\mu$ g/mL kanamycin and 35  
552  $\mu$ g/mL chloramphenicol at 37 °C with shaking until the OD<sub>600</sub> reached ~3 and then cooled to 18°C  
553 for 1 hour. Isopropyl  $\beta$ -D-1-thiogalactopyranoside (IPTG) was added to a final concentration of  
554 0.1 mM and the cultures were left overnight at 18 °C. The cells were collected by centrifugation  
555 then resuspended in 2x lysis buffer (100 mM HEPES buffer, pH 7.5, 1.0 M NaCl, 20 mM  
556 imidazole, 1.0 mM tris(2-carboxyethyl)phosphine (TCEP), Protease Inhibitor Cocktail Set VII  
557 (Calbiochem, 1/500 dilution) and flash-frozen in liquid nitrogen. Cells were lysed by sonication  
558 on ice. The resulting proteins were purified using Ni-Sepharose resin (GE Healthcare) and eluted  
559 stepwise in binding buffer with 300 mM imidazole. Removal of the hexahistidine tag was  
560 performed at 4 °C overnight using recombinant TEV protease. Protein was further purified using  
561 reverse affinity chromatography on Ni-Sepharose followed by gel filtration (Superdex 200 16/60,  
562 GE Healthcare). Protein in gel filtration buffer (25 mM HEPES, 500 mM NaCl, 0.5 mM TCEP,  
563 5% [v/v] glycerol) was concentrated to 12 mg/mL (measured by UV absorbance, using the  
564 calculated molecular weight and estimated extinction coefficient, using a NanoDrop  
565 spectrophotometer (Thermo Scientific)) using 30 kDa molecular weight cut-off centrifugal  
566 concentrators (Millipore) at 4 °C.

567

568 **Protein crystallization:** The AAK1 inhibitor (dissolved in 100 % DMSO) was added to the  
569 protein in a 3-fold molar excess and incubated on ice for approximately 30 minutes. The mixture  
570 was centrifuged at 14,000 rpm for 10 minutes at 4 °C prior to setting up 150 nL volume sitting  
571 drops at three ratios (2:1, 1:1, or 1:2 protein-inhibitor complex to reservoir solution).  
572 Crystallization experiments were performed at 20 °C. Crystals were cryoprotected in mother liquor

573 supplemented with 20-25% glycerol before flash-freezing in liquid nitrogen for data collection.  
574 Diffraction data was collected at the Diamond Light Source. The best diffracting crystals grew in  
575 10% (v/v) Broad MW PEG smear, 3.2 M MgCl<sub>2</sub>, 100 mM Hepes pH 7.0<sup>44</sup>. Data was collected at  
576 100 K at the Diamond Synchrotron beamline I02. Data collection statistics can be found in  
577 Supplementary Table 4.

578  
579 **Crystal structure determination:** Diffraction data were integrated using XDS<sup>45</sup> and scaled using  
580 AIMLESS from the CCP4 software suite<sup>46</sup>. Molecular replacement was performed with Phaser<sup>47</sup>  
581 using BMP2K/AZD7762 (PDB: 4W9W)<sup>43</sup> as a search model. Automated model building was  
582 performed with Buccaneer<sup>48</sup>. Automated refinement was performed in PHENIX<sup>49</sup>. Coot<sup>50</sup> was used  
583 for manual model building and real space refinement. Structure validation was performed using  
584 MolProbity<sup>51</sup>. Structure factors and coordinates have been deposited in the PDB with code 5IKW.

585  
586 **Binding-displacement assays:** The TR-FRET ligand binding-displacement assays for AAK1,  
587 BMP2K, GAK and STK16 were performed as previously described<sup>52</sup>.

588  
589 **Kinome screening:** The KINOMEScan assay panel was measured at DiscoverX Corporation as  
590 previously described<sup>53</sup>. Data collection can be found in Supplementary Table 2.

591  
592 **Isothermal Titration Calorimetry:** AAK1 and BMP2K proteins were produced as previously  
593 described<sup>43</sup>. Isothermal titration calorimetry measurements were made on a Microcal VP-ITC  
594 instrument at 25 °C. For the interaction of AAK1 with SGC-AAK1-1, the compound was diluted  
595 to 22 μM in ITC buffer from a stock at 10 mM in DMSO and loaded directly into the cell. AAK1

596 was dialyzed at 4 °C overnight into ITC buffer (20 mM HEPES pH 7.5, 150 mM NaCl, 1 mM  
597 TCEP) and loaded into the ITC syringe at a final concentration of 218 μM. Following thermal  
598 equilibration, AAK1 was titrated into the cell using serial injections of 8 μL until saturation was  
599 observed in the thermogram. The same method was repeated for the BMP2K versus SGC-AAK1-  
600 1 interaction where protein was loaded into the syringe at a concentration of 288 μM and injected  
601 into a 32 μM solution of SGC-AAK1-1. The ITC data was analyzed with NITPIC<sup>54</sup> and  
602 SEDPHAT<sup>55</sup>. The final fitted data values are in Supplementary Table 3.

603  
604 **Measurement of *in vitro* IC<sub>50</sub> values for inhibition of AAK1 enzymatic activity:** Enzymatic  
605 activity of AAK1 was monitored in 20 μL reaction volumes containing 25 nM AAK1 (27-365) in  
606 15 mM MOPS pH 7.5, 2 mM MgCl<sub>2</sub> and 0.004% triton X-100 buffer plus 46 μM ATP (at *K<sub>m</sub>*) and  
607 200 μM of an AP-2 derived peptide (biotin-GGSQITSQVTGQIGWRR-amide). Optimal activity  
608 was achieved with sample incubation at 37 °C for 40 minutes (steady-state conditions) in buffer  
609 conditions that were tailored by factorial design using Design-Expert software (Stat-Ease, version  
610 10). To generate inhibition curves, end-point reactions were setup having compounds pre-  
611 incubated in a reaction mix without ATP for 10 minutes at room temperature. Next, all samples  
612 (in PCR tubes) were transferred to a PCR instrument set at 37 °C for another 5 minutes. The  
613 reaction started with the addition of 46 μM ATP (at *K<sub>m</sub>*), maintaining the incubation conditions for  
614 another 40 minutes. The reactions were stopped and the amount of ADP produced was measured  
615 using a coupled enzyme assay system that converts Amplex Red to Resorufin<sup>56</sup>. Fluorescence  
616 readings were made in a BMG Labtech Clariostar instrument with excitation peak set at 530 nm  
617 and emission peak reading at 590 nm.

618

619 **NanoBRET measurements:** Constructs for NanoBRET measurements of AAK1 and BMP2K  
620 were kindly provided by Promega. The AAK1 construct represents the short isoform of AAK1  
621 with an N-terminal Nanoluc fusion, and the BMP2K construct represents residues the short  
622 isoform of BMP2K with an N-terminal Nanoluc fusion. HEK293T cells (ATCC) were maintained  
623 in DMEM supplemented with 10% fetal bovine serum (FBS) (Life Technologies) with penicillin  
624 and streptomycin. NanoLuc-AAK1 or NanoLuc-BMP2K fusion constructs were complexed with  
625 Lipofectamine 2000 according to the manufacturer's protocol (Invitrogen). DNA:Lipofectamine  
626 complexes were formed with 24  $\mu$ g DNA and 60  $\mu$ L Lipofectamine. The transfection complexes  
627 were then mixed with HEK293T cells in a 100 mm dish at 50-70% confluence in serum-free  
628 DMEM (Lonza), followed by incubation in a humidified, 37 °C, 5% CO<sub>2</sub> incubator. After 4 hours  
629 of incubation, the medium was replaced by 10% FBS DMEM with antibiotics and the cells were  
630 incubated for an additional 20 hours. The NanoBRET assay was performed as previously  
631 described<sup>57</sup>. Briefly, cells were trypsinized and resuspended in Opti-MEM without phenol red  
632 (Life Technologies). Cells (85  $\mu$ L) were then seeded into white, nonbinding surface plates  
633 (Corning) at a density of  $2 \times 10^4$  cells/well. Diluted tracer was prepared from 200  $\mu$ M stock in  
634 Tracer Dilution Buffer (32.25% PEG400 in 12.5 mM HEPES Buffer pH 7.5) at a 1 to 4 ratio, and  
635 5  $\mu$ L was added to the cells to have a final concentration of 2, 1, 0.5 or 0.25  $\mu$ M. All chemical  
636 inhibitors were prepared as concentrated stock solutions in dimethylsulfoxide (DMSO) (Sigma-  
637 Aldrich). Serial dilutions of the inhibitors at 50x the final assay concentration were made by  
638 dilution with DMSO, before the inhibitors were added to the cells at 1:50 ratio (2% final DMSO  
639 concentration). Cells were then incubated for 2 hours before Bioluminescence resonance energy  
640 transfer (BRET) measurements. To measure BRET, NanoBRET NanoGlo Substrate (Promega)  
641 was added, and filtered luminescence was measure on a BMG LABTECH Clariostar luminometer

642 equipped with 450 nm BP filter (donor) and 610 nm LP filter (acceptor), using 0.5 s integration  
643 time with gain settings of 3,600 for both filters. Background-corrected BRET ratios were  
644 determined by subtracting the BRET ratios of samples with no tracer added.

645  
646 **Statistics:** All error bars are +/- standard error (SE). Statistical significance was evaluated by  
647 Mann-Whitney t-test unless otherwise stated. N values are stated in figure legends. Each panel  
648 was performed in at least biological triplicate, with higher replicates noted in figure legend. \*\*\*  
649  $p < 0.0005$ , \*\*  $p < 0.005$ , \*  $p < 0.05$ .

650  
651  
652 **ACKNOWLEDGEMENTS:** M.B.M. acknowledges support from the National Institutes of  
653 Health (RO1-CA187799 and U24-DK116204-01). M.J.A received financial support from National  
654 Institutes of Health T32 Predoctoral Training Grant in Pharmacology (T32-GM007040-43, T32-  
655 GM007040-42) and Initiative for Maximizing Student Diversity Grant (R25-GM055336-16).  
656 M.P.W. received support from the Lymphoma Research Foundation (337444) and the National  
657 Institutes of Health (T32-CA009156-35). The UNC Flow Cytometry Core Facility is supported in  
658 part by P30 CA016086 Cancer Center Core Support Grant to the UNC Lineberger Comprehensive  
659 Cancer Center. The SGC is a registered charity (number 1097737) that receives funds from  
660 AbbVie, Bayer Pharma AG, Boehringer Ingelheim, Canada Foundation for Innovation, Eshelman  
661 Institute for Innovation, Genome Canada, Innovative Medicines Initiative (EU/EFPIA) [ULTRA-  
662 DD grant no. 115766], Janssen, Merck & Co., Merck KGaA (Darmstadt, Germany), Novartis  
663 Pharma AG, Ontario Ministry of Economic Development and Innovation, Pfizer, São Paulo  
664 Research Foundation-FAPESP (2013/50724-5), Takeda, and Wellcome Trust [106169/ZZ14/Z].

665 R.R.R.S received financial support from FAPESP (2016/17469-0). The authors would like to thank  
666 members of the Major Laboratory for their feedback and expertise regarding experimental design  
667 and project direction. The authors also thank Claire Strain-Damerell and Pavel Savitsky for cloning  
668 various mutants of AAK1 and BMP2K proteins that were used in the crystallization trials.

669

670 **AUTHOR CONTRIBUTIONS:** M.J.A. co-led molecular characterization of AAK1, designed  
671 and carried out molecular biology experiments, and drafted and wrote manuscript. M.P.W. co-led  
672 molecular characterization of AAK1, designed and carried out molecular biology experiments and  
673 contributed to writing. A.D.A. synthesized SGC-AAK1-1, led SGC probe declaration effort, and  
674 contributed to writing. R.R.R. carried out NanoBRET measurements and cellular IC<sub>50</sub>  
675 measurements (pAP2 Westerns). A.D.R. contributed to cloning and carrying out kinome gain-of-  
676 function screen and validation. D.M.G. contributed to AAK1 signaling characterization. M.G.  
677 carried out flow cytometry experiments. D.S.S. carried out dose response and pAP2M1  
678 characterization of SGC-AAK1-1 and 25A. J.M.B. carried out NAK TR-FRET selectivity panel.  
679 R.M.C. made AAK1/BMP2K proteins and produced co-crystal structures. D.H.D. proposed and  
680 designed analogues. J.M.E. facilitated experimental design and contributed to writing. O.F.  
681 facilitated *in vitro* assays. C.G. made AAK1 proteins for crystallization/assays. O.G. facilitated  
682 protein synthesis and crystallization. P.H.G. carried out TR-FRET measurements and *in vitro* IC<sub>50</sub>  
683 measurements. N.K. executed compound scale-up for validation studies. S.M. contributed ideas  
684 and managed SGC probe declaration effort. A.S.S. made AAK1/BMP2K proteins for  
685 crystallization/assays. F.J.S. made proteins for NAK selectivity panel and ITC and carried out ITC  
686 experiments. C.I.W. synthesized 25A and SGC-AAK1-1N. T.M.W. managed chemistry efforts  
687 and aided in the design of molecules. W.J.Z. designed molecules, facilitated SGC

688 probe declaration, and contributed to writing. M.B.M facilitated experimental design, project  
689 management and contributed to writing.

690

691 **COMPETING INTERESTS:** The authors declare no potential conflicts of interest.

692

693

## 694 REFERENCES

- 695 1 Nusse, R. & Clevers, H. Wnt/beta-Catenin Signaling, Disease, and Emerging Therapeutic  
696 Modalities. *Cell* **169**, 985-999, doi:10.1016/j.cell.2017.05.016 (2017).
- 697 2 Angers, S. & Moon, R. T. Proximal events in Wnt signal transduction. *Nat Rev Mol Cell*  
698 *Biol* **10**, 468-477, doi:10.1038/nrm2717 (2009).
- 699 3 Liu, C. *et al.* Control of beta-catenin phosphorylation/degradation by a dual-kinase  
700 mechanism. *Cell* **108**, 837-847 (2002).
- 701 4 Liu, C. *et al.* beta-Trcp couples beta-catenin phosphorylation-degradation and regulates  
702 *Xenopus* axis formation. *Proc Natl Acad Sci U S A* **96**, 6273-6278 (1999).
- 703 5 Zeng, X. *et al.* A dual-kinase mechanism for Wnt co-receptor phosphorylation and  
704 activation. *Nature* **438**, 873-877, doi:10.1038/nature04185 (2005).
- 705 6 Hernandez, A. R., Klein, A. M. & Kirschner, M. W. Kinetic responses of beta-catenin  
706 specify the sites of Wnt control. *Science* **338**, 1337-1340, doi:10.1126/science.1228734  
707 (2012).
- 708 7 Bilic, J. *et al.* Wnt induces LRP6 signalosomes and promotes dishevelled-dependent LRP6  
709 phosphorylation. *Science* **316**, 1619-1622, doi:10.1126/science.1137065 (2007).
- 710 8 Behrens, J. *et al.* Functional interaction of beta-catenin with the transcription factor LEF-  
711 1. *Nature* **382**, 638-642, doi:10.1038/382638a0 (1996).
- 712 9 Honing, S. *et al.* Phosphatidylinositol-(4,5)-bisphosphate regulates sorting signal  
713 recognition by the clathrin-associated adaptor complex AP2. *Mol Cell* **18**, 519-531,  
714 doi:10.1016/j.molcel.2005.04.019 (2005).
- 715 10 Ricotta, D., Conner, S. D., Schmid, S. L., von Figura, K. & Honing, S. Phosphorylation of  
716 the AP2 mu subunit by AAK1 mediates high affinity binding to membrane protein sorting  
717 signals. *J Cell Biol* **156**, 791-795, doi:10.1083/jcb.200111068 (2002).
- 718 11 Kadlecova, Z. *et al.* Regulation of clathrin-mediated endocytosis by hierarchical allosteric  
719 activation of AP2. *J Cell Biol* **216**, 167-179, doi:10.1083/jcb.201608071 (2017).
- 720 12 Conner, S. D. & Schmid, S. L. Identification of an adaptor-associated kinase, AAK1, as a  
721 regulator of clathrin-mediated endocytosis. *J Cell Biol* **156**, 921-929,  
722 doi:10.1083/jcb.200108123 (2002).
- 723 13 Conner, S. D., Schroter, T. & Schmid, S. L. AAK1-mediated micro2 phosphorylation is  
724 stimulated by assembled clathrin. *Traffic* **4**, 885-890 (2003).



- 725 14 Henderson, D. M. & Conner, S. D. A novel AAK1 splice variant functions at multiple steps  
726 of the endocytic pathway. *Mol Biol Cell* **18**, 2698-2706, doi:10.1091/mbc.E06-09-0831  
727 (2007).
- 728 15 Damke, H., Baba, T., Warnock, D. E. & Schmid, S. L. Induction of mutant dynamin  
729 specifically blocks endocytic coated vesicle formation. *J Cell Biol* **127**, 915-934 (1994).
- 730 16 Hagemann, A. I. *et al.* In vivo analysis of formation and endocytosis of the Wnt/beta-  
731 catenin signaling complex in zebrafish embryos. *J Cell Sci* **127**, 3970-3982,  
732 doi:10.1242/jcs.148767 (2014).
- 733 17 Blitzer, J. T. & Nusse, R. A critical role for endocytosis in Wnt signaling. *BMC Cell Biol*  
734 **7**, 28, doi:10.1186/1471-2121-7-28 (2006).
- 735 18 Jiang, Y., He, X. & Howe, P. H. Disabled-2 (Dab2) inhibits Wnt/beta-catenin signalling  
736 by binding LRP6 and promoting its internalization through clathrin. *EMBO J* **31**, 2336-  
737 2349, doi:10.1038/emboj.2012.83 (2012).
- 738 19 Kim, I. *et al.* Clathrin and AP2 are required for PtdIns(4,5)P2-mediated formation of LRP6  
739 signalosomes. *J Cell Biol* **200**, 419-428, doi:10.1083/jcb.201206096 (2013).
- 740 20 Yamamoto, H., Sakane, H., Yamamoto, H., Michiue, T. & Kikuchi, A. Wnt3a and Dkk1  
741 regulate distinct internalization pathways of LRP6 to tune the activation of beta-catenin  
742 signaling. *Dev Cell* **15**, 37-48, doi:10.1016/j.devcel.2008.04.015 (2008).
- 743 21 Pan, W. *et al.* Wnt3a-mediated formation of phosphatidylinositol 4,5-bisphosphate  
744 regulates LRP6 phosphorylation. *Science* **321**, 1350-1353, doi:10.1126/science.1160741  
745 (2008).
- 746 22 Liu, C. C., Kanekiyo, T., Roth, B. & Bu, G. Tyrosine-based signal mediates LRP6 receptor  
747 endocytosis and desensitization of Wnt/beta-catenin pathway signaling. *J Biol Chem* **289**,  
748 27562-27570, doi:10.1074/jbc.M113.533927 (2014).
- 749 23 Taelman, V. F. *et al.* Wnt signaling requires sequestration of glycogen synthase kinase 3  
750 inside multivesicular endosomes. *Cell* **143**, 1136-1148, doi:10.1016/j.cell.2010.11.034  
751 (2010).
- 752 24 Gammons, M. V., Renko, M., Johnson, C. M., Rutherford, T. J. & Bienz, M. Wnt  
753 Signalosome Assembly by DEP Domain Swapping of Dishevelled. *Mol Cell* **64**, 92-104,  
754 doi:10.1016/j.molcel.2016.08.026 (2016).
- 755 25 Madan, B. *et al.* USP6 oncogene promotes Wnt signaling by deubiquitylating Frizzleds.  
756 *Proc Natl Acad Sci U S A* **113**, E2945-2954, doi:10.1073/pnas.1605691113 (2016).
- 757 26 Walker, M. P. *et al.* FOXP1 potentiates Wnt/beta-catenin signaling in diffuse large B cell  
758 lymphoma. *Sci Signal* **8**, ra12, doi:10.1126/scisignal.2005654 (2015).
- 759 27 Biechele, T. L. *et al.* Wnt/beta-catenin signaling and AXIN1 regulate apoptosis triggered  
760 by inhibition of the mutant kinase BRAFV600E in human melanoma. *Sci Signal* **5**, ra3,  
761 doi:10.1126/scisignal.2002274 (2012).
- 762 28 Elkins, J. M. *et al.* Comprehensive characterization of the Published Kinase Inhibitor Set.  
763 *Nat Biotechnol* **34**, 95-103, doi:10.1038/nbt.3374 (2016).
- 764 29 Vasta, J. D. *et al.* Quantitative, Wide-Spectrum Kinase Profiling in Live Cells for  
765 Assessing the Effect of Cellular ATP on Target Engagement. *Cell Chem Biol*,  
766 doi:10.1016/j.chembiol.2017.10.010 (2017).
- 767 30 Wang, L. H., Rothberg, K. G. & Anderson, R. G. Mis-assembly of clathrin lattices on  
768 endosomes reveals a regulatory switch for coated pit formation. *J Cell Biol* **123**, 1107-1117  
769 (1993).

- 770 31 Phonphok, Y. & Rosenthal, K. S. Stabilization of clathrin coated vesicles by amantadine,  
771 tromantadine and other hydrophobic amines. *FEBS Lett* **281**, 188-190 (1991).
- 772 32 Huang, Y., Qureshi, I. A. & Chen, H. Effects of phosphatidylinositol 4,5-bisphosphate and  
773 neomycin on phospholipase D: kinetic studies. *Mol Cell Biochem* **197**, 195-201 (1999).
- 774 33 Baron, C. B., Pompeo, J., Blackman, D. & Coburn, R. F. Common phosphatidylinositol  
775 4,5-bisphosphate pools are involved in carbachol and serotonin activation of tracheal  
776 smooth muscle. *J Pharmacol Exp Ther* **266**, 8-15 (1993).
- 777 34 Toker, A. The synthesis and cellular roles of phosphatidylinositol 4,5-bisphosphate. *Curr*  
778 *Opin Cell Biol* **10**, 254-261 (1998).
- 779 35 Hu, J. *et al.* Resolution of structure of PIP5K1A reveals molecular mechanism for its  
780 regulation by dimerization and dishevelled. *Nat Commun* **6**, 8205,  
781 doi:10.1038/ncomms9205 (2015).
- 782 36 Chen, W. J., Goldstein, J. L. & Brown, M. S. NPXY, a sequence often found in cytoplasmic  
783 tails, is required for coated pit-mediated internalization of the low density lipoprotein  
784 receptor. *J Biol Chem* **265**, 3116-3123 (1990).
- 785 37 Collawn, J. F. *et al.* Transferrin receptor internalization sequence YXRF implicates a tight  
786 turn as the structural recognition motif for endocytosis. *Cell* **63**, 1061-1072 (1990).
- 787 38 Kostich, W. *et al.* Inhibition of AAK1 Kinase as a Novel Therapeutic Approach to Treat  
788 Neuropathic Pain. *J Pharmacol Exp Ther* **358**, 371-386, doi:10.1124/jpet.116.235333  
789 (2016).
- 790 39 Shi, B., Conner, S. D. & Liu, J. Dysfunction of endocytic kinase AAK1 in ALS. *Int J Mol*  
791 *Sci* **15**, 22918-22932, doi:10.3390/ijms151222918 (2014).
- 792 40 Ultanir, S. K. *et al.* Chemical genetic identification of NDR1/2 kinase substrates AAK1  
793 and Rabin8 Uncover their roles in dendrite arborization and spine development. *Neuron*  
794 **73**, 1127-1142, doi:10.1016/j.neuron.2012.01.019 (2012).
- 795 41 Kuai, L. *et al.* AAK1 identified as an inhibitor of neuregulin-1/ErbB4-dependent  
796 neurotrophic factor signaling using integrative chemical genomics and proteomics. *Chem*  
797 *Biol* **18**, 891-906, doi:10.1016/j.chembiol.2011.03.017 (2011).
- 798 42 Gupta-Rossi, N. *et al.* The adaptor-associated kinase 1, AAK1, is a positive regulator of  
799 the Notch pathway. *J Biol Chem* **286**, 18720-18730, doi:10.1074/jbc.M110.190769 (2011).
- 800 43 Sorrell, F. J., Szklarz, M., Abdul Azeez, K. R., Elkins, J. M. & Knapp, S. Family-wide  
801 Structural Analysis of Human Numb-Associated Protein Kinases. *Structure* **24**, 401-411,  
802 doi:10.1016/j.str.2015.12.015 (2016).
- 803 44 Chaikuad, A., Knapp, S. & von Delft, F. Defined PEG smears as an alternative approach  
804 to enhance the search for crystallization conditions and crystal-quality improvement in  
805 reduced screens. *Acta Crystallogr D Biol Crystallogr* **71**, 1627-1639,  
806 doi:10.1107/S1399004715007968 (2015).
- 807 45 Kabsch, W. Xds. *Acta Crystallogr D Biol Crystallogr* **66**, 125-132,  
808 doi:10.1107/S09074444909047337 (2010).
- 809 46 Winn, M. D. *et al.* Overview of the CCP4 suite and current developments. *Acta Crystallogr*  
810 *D Biol Crystallogr* **67**, 235-242, doi:10.1107/S09074444910045749 (2011).
- 811 47 McCoy, A. J. *et al.* Phaser crystallographic software. *J Appl Crystallogr* **40**, 658-674,  
812 doi:10.1107/S0021889807021206 (2007).
- 813 48 Cowtan, K. The Buccaneer software for automated model building. 1. Tracing protein  
814 chains. *Acta Crystallogr D Biol Crystallogr* **62**, 1002-1011,  
815 doi:10.1107/S09074444906022116 (2006).

- 816 49 Adams, P. D. *et al.* PHENIX: a comprehensive Python-based system for macromolecular  
817 structure solution. *Acta Crystallogr D Biol Crystallogr* **66**, 213-221,  
818 doi:10.1107/S0907444909052925 (2010).
- 819 50 Emsley, P., Lohkamp, B., Scott, W. G. & Cowtan, K. Features and development of Coot.  
820 *Acta Crystallogr D Biol Crystallogr* **66**, 486-501, doi:10.1107/S0907444910007493  
821 (2010).
- 822 51 Chen, V. B. *et al.* MolProbity: all-atom structure validation for macromolecular  
823 crystallography. *Acta Crystallogr D Biol Crystallogr* **66**, 12-21,  
824 doi:10.1107/S0907444909042073 (2010).
- 825 52 Asquith, C. R. M. *et al.* Identification and Optimization of 4-Anilinoquinolines as  
826 Inhibitors of Cyclin G Associated Kinase. *ChemMedChem* **13**, 48-66,  
827 doi:10.1002/cmcd.201700663 (2018).
- 828 53 Davis, M. I. *et al.* Comprehensive analysis of kinase inhibitor selectivity. *Nat Biotechnol*  
829 **29**, 1046-1051, doi:10.1038/nbt.1990 (2011).
- 830 54 Keller, S. *et al.* High-precision isothermal titration calorimetry with automated peak-shape  
831 analysis. *Anal Chem* **84**, 5066-5073, doi:10.1021/ac3007522 (2012).
- 832 55 Zhao, H., Piszczek, G. & Schuck, P. SEDPHAT--a platform for global ITC analysis and  
833 global multi-method analysis of molecular interactions. *Methods* **76**, 137-148,  
834 doi:10.1016/j.ymeth.2014.11.012 (2015).
- 835 56 Charter, N. W., Kauffman, L., Singh, R. & Eglen, R. M. A generic, homogenous method  
836 for measuring kinase and inhibitor activity via adenosine 5'-diphosphate accumulation. *J*  
837 *Biomol Screen* **11**, 390-399, doi:10.1177/1087057106286829 (2006).
- 838 57 Robers, M. B. *et al.* Target engagement and drug residence time can be observed in living  
839 cells with BRET. *Nat Commun* **6**, 10091, doi:10.1038/ncomms10091 (2015).
- 840
